1       **Validity, reliability, and readability of single-item and short physical activity**  
2                   **questionnaires for use in surveillance: a systematic review**

3

4    Authors:

5    Antonina Tcymbal<sup>1\*</sup>, Sven Messing<sup>1</sup>, Rachel Mait<sup>1</sup>, Roberto Galindo Perez<sup>1</sup>, Taiyeba  
6    Akter<sup>1</sup>, Ivo Rakovac<sup>2</sup>, Peter Gelius<sup>1</sup>, Karim Abu-Omar<sup>1</sup>

7    1 Department of Sport Science and Sport, Friedrich-Alexander-Universität Erlangen-  
8    Nürnberg, Gebbertstr. 123b, 91058 Erlangen, Germany

9    2 World Health Organization Regional Office for Europe, Marmorvej 51, DK-2100  
10    Copenhagen, Denmark

11    \* Corresponding author:

12    Dr. Antonina Tcymbal

13    [antonina.tcymbal@fau.de](mailto:antonina.tcymbal@fau.de)

14

15

16

17

18

19

20

21

22    NOTE: This preprint reports new research that has not been certified by peer review and should not be used to guide clinical practice.

23 **Abstract**

24 Background: Accurate and fast measurement of physical activity is important for  
25 surveillance. Even though many physical activity questionnaires (PAQ) are currently  
26 used in research, it is unclear which of them is the most reliable, valid, and easy to  
27 use. This systematic review aimed to identify existing brief PAQs, describe and  
28 compare their measurement properties, and assess their level of readability.

29 Methods: We performed a systematic review based on the PRISMA statement.

30 Literature searches were conducted in six scientific databases in March 2022.

31 Articles were included if they evaluated validity and/or reliability of brief (i.e., with a  
32 maximum of three questions) physical activity or exercise questionnaires intended for  
33 healthy adults. Due to the heterogeneity of studies, data were summarized  
34 narratively. The level of readability was calculated according to the Flesch-Kincaid  
35 formula.

36 Results: In total, 34 articles published in English or Spanish were included,  
37 evaluating 31 distinct brief PAQs. The studies indicated moderate to good levels of  
38 reliability for the PAQs. However, the majority of results showed weak validity when  
39 validated against objective measurements and demonstrated weak to moderate  
40 validity when validated against other PAQs. Most of the assessed PAQs met the  
41 criterion of being "short," allowing respondents to complete them in less than one  
42 minute either by themselves or with an interviewer. However, only 17 questionnaires  
43 had a readability level that indicates that the PAQ is easy to understand for the  
44 majority of the population.

45 Conclusions: This review identified a variety of brief PAQs, but most of them were  
46 evaluated in only a single study. The methods used to assess measurement  
47 properties varied widely across studies, limiting the comparability between different

48 PAQs and making it challenging to identify a single tool as the most suitable.  
49 Furthermore, PAQs employed different concepts for measuring physical activity,  
50 necessitating consideration of measurement properties and assessment goals when  
51 selecting a specific tool. None of the evaluated brief PAQs allowed for the  
52 measurement of whether a person fulfills the main WHO physical activity  
53 recommendations. Future development or adaptation of PAQs should prioritize  
54 readability as an important factor to enhance their usability.

55

56 **Keywords:** physical activity, questionnaire, measurement properties, validity,  
57 reliability, readability, surveillance

58

## 59 **Background**

60 It has been demonstrated that regular physical activity (PA) can help improve  
61 physical and mental functions as well as reverse some effects of chronic diseases  
62 (1). Regularly engaging in 150 minutes of PA per week (2), alongside following a  
63 healthy diet and abstaining from smoking and alcohol consumption, is seen as being  
64 key to prevent non-communicable diseases.

65 However, accurate measurement of PA levels is important to determine the amount  
66 of activity needed to improve health and identify links with other health outcomes and  
67 behaviors (3). To this day, self-report questionnaires are the most common measures  
68 to collect PA data, often as part of surveillance systems such as the Behavioral Risk  
69 Factor Surveillance System (4), the WHO STEPwise approach to noncommunicable  
70 disease risk factor surveillance (5), and the European Health Interview Survey (6).  
71 While such self-report questionnaires have seen widespread use because of their

72 efficiency, they have also been shown to have limitations related to bias and data  
73 accuracy (7).

74 Many different self-report questionnaires have been developed over the years with  
75 the Global Physical Activity Questionnaire (GPAQ), the International Physical Activity  
76 Questionnaire (IPAQ; also available as a short form, IPAQ-SF), and the European  
77 Health Interview Survey Physical Activity Questionnaire (EHIS-PAQ) being the most  
78 widely utilized in global PA surveillance (8). All three questionnaires assess PA  
79 across different domains, asking respondents to report their PA in a typical week  
80 (GPAQ, EHIS-PAQ) or during the last 7 days (IPAQ-SF). All three are comparatively  
81 complex and range from seven items (IPAQ-SF) to 16 (GPAQ). Nevertheless, the  
82 measurement properties of these questionnaires are modest. For GPAQ (9), IPAQ-  
83 SF (10, 11), and the EHIS-PAQ (12), different studies have demonstrated reasonable  
84 reliability but comparatively low validity. In a recent review (8) of IPAQ-SF, GPAQ,  
85 and EHIS-PAQ, the questionnaires showed low-to-moderate validity against objective  
86 measures of PA such as accelerometers, and moderate-to-high validity against  
87 subjectively measured PA such as other questionnaires.

88 It is well known that questionnaires with many items can increase the response  
89 burden on respondents (13, 14), which has resulted in the development of several  
90 short self-report instruments. In contrast to the detailed questionnaires mentioned  
91 above, the purpose of short PA questionnaires is to simplify and speed up the  
92 procedure for assessing PA levels.

93 In addition, language-related difficulties are currently an important topic in public  
94 health. Patient education materials can increase patient compliance, but only if they  
95 are written in a language that is easy for the patient to understand (15). Regarding  
96 PA questionnaires, Altschuler et al. (16) found significant gaps between respondents'

97 interpretations of some PA questions and researchers' original assumptions about  
98 what those questions were intended to measure. One of the characteristics of  
99 language difficulty is the level of readability, which indicates how easily readers can  
100 understand the text. Research of texts used in healthcare consistently shows that  
101 materials intended for patients often require a high level of education and are too  
102 complicated for the average person (15, 17). In relation to physical activity  
103 questionnaires (PAQs), readability can influence the amount of time a person needs  
104 to understand the question and, if the text is too complicated, may potentially  
105 decrease the response rate and correctness of the answer.

106 A number of existing reviews have investigated the measurement properties of PA  
107 questionnaires. Van Poppel et al. (18) reviewed the validity and reliability  
108 methodology of 85 versions of PAQs with no clear consensus regarding the best  
109 questionnaire for PA measurement. Helmerhost et al. (19) studied reliability and  
110 objective criterion-related validity of 34 newly-developed and 96 existing PAQs.  
111 However, to our knowledge, a dedicated review of short and brief PA questionnaires  
112 measurement properties has not yet been performed. Therefore, the aim of this  
113 systematic review is to identify existing brief PAQs and to comparatively describe  
114 their measurement properties and level of readability.

115

## 116 **Methods**

117 This review follows the guidelines of the PRISMA (Preferred Reporting Items for  
118 Systematic reviews and Meta-Analyses) statement (20) and the Consensus-based  
119 Standards for the Selection of Health Measurement Instruments (COSMIN) guideline  
120 for systematic reviews of patient-reported outcome measures (21).

121

122 *Information sources and search strategy*

123 A systematic search was performed in six databases (PubMed, Web of Science,  
124 Scopus, CINAHL, SportDiscus, PsycInfo) in March 2022. Additionally, reference lists  
125 from previous reviews of PA questionnaires and other relevant publications were  
126 screened to identify additional studies. A comprehensive search strategy was  
127 developed with a combination of keywords in the categories of measured construct  
128 (physical activity) and type of instruments (brief/short questionnaire).

129 The resulting search string was as follows:

130 ("physical activit\*" OR "physical inactivit\*")

131 AND

132 (questionnaire OR measure OR evaluat\* OR assess\* OR surveillance OR monitor\*  
133 OR screening)

134 AND

135 ("single item" OR single-item OR "single question" OR "one item" OR one-item OR  
136 "one question" OR "brief questionnaire " OR "short questionnaire " OR "brief  
137 assessment" OR "short assessment" OR "two-item\*" OR "two-item\*" OR "two  
138 questions" OR "brief physical activity assessment" OR "Single response" OR "Single-  
139 response")

140 No restrictions were made regarding language or publication date.

141

142 *Eligibility criteria*

143 Articles were included in the review if they fulfilled the following eligibility criteria:

144 1. The article described a self-report PA or exercise questionnaire intended for  
145 healthy adults.

146 2. The evaluated questionnaire was brief and included a maximum of three  
147 questions.

148 3. The article investigated one or more measurement properties of the  
149 questionnaire.

150 4. The article was published in a peer-reviewed journal.

151

152 Articles were excluded based on the following exclusion criteria:

153 1. The article focused on a questionnaire that measured only physical inactivity,  
154 screen time, or sedentary behavior.

155 2. The evaluated questionnaire was intended solely for children and adolescents or  
156 people with specific conditions.

157 3. The article did not investigate the measurement properties of the questionnaire.

158

### 159 *Study selection*

160 Two reviewers independently screened and selected the relevant articles. First, all  
161 articles were screened based on titles and abstracts. If the title and/or abstract  
162 indicated that the study fulfilled the inclusion criteria, both reviewers screened the full  
163 text for eligibility. When necessary, supplementary files were also reviewed for  
164 additional information. Disagreements between the reviewers were discussed within  
165 the research team until a consensus was reached.

166 Records were managed using the Covidence systematic review software (Veritas  
167 Health Innovation, Melbourne, Australia; [www.covidence.org](http://www.covidence.org)) and EndNote X9  
168 (Clarivate Analytics, Philadelphia, PA, USA).

169

#### 170 *Data extraction*

171 Data of included studies were extracted and summarized by one reviewer and  
172 verified by a second reviewer to reduce bias and error. Discrepancies were  
173 discussed between reviewers to achieve consensus. Extracted information included:  
174 publication details (first author, year of publication, country), sample characteristics  
175 (number of participants, age category, special health conditions), the measurement  
176 tool(s) explored, who assessed PA levels of participants, assessed measurement  
177 properties, other measurement tool(s) used as a comparison, reliability test-retest  
178 interval, and the results of the study.

179

#### 180 *Risk of bias assessment*

181 The methodological quality of the individual studies included in this review was  
182 assessed with 18 questions based on the Appraisal tool for Cross-Sectional Studies  
183 (AXIS) (22). In order to specifically assess the quality of the tools' validity and  
184 reliability measurement properties, some questions were modified based on the  
185 COSMIN risk of bias checklist (21) and on suggestions from previous systematic  
186 reviews examining PA assessment measures (23). This quality assessment  
187 evaluated articles based on study design, sample size, participant selection process,  
188 appropriate blinding, examiner experience, method of measurement, adequate data  
189 reporting, internal consistency, and six other categories (see Additional file 1). Risk of  
190 bias assessment was conducted independently by two reviewers, with any



191 discrepancies resolved through discussion in the research team. Studies were  
192 scored 1 if they satisfied the quality element, and 0 if they did not. The summary  
193 score (range: 0–18) indicates the risk of bias, with a higher score indicating higher  
194 quality and therefore a lower risk of bias.

195

#### 196 *Data synthesis and analysis of measurement properties*

197 The primary objective of this systematic review was to identify existing short  
198 questionnaires suitable for assessing PA levels in surveillance and primary care  
199 settings, and to compare their measurement properties. To accomplish this goal,  
200 relevant information from the included studies was summarized separately for each  
201 questionnaire. In order to evaluate the reliability and validity of the identified  
202 questionnaires, a range of tests were employed in the included studies. Some  
203 studies reported results for a total questionnaire summary score, while others  
204 assessed reliability and validity for specific aspects, intensities, or domains of the  
205 questionnaire. Additionally, certain studies examined these measurement properties  
206 within subgroups of the test population. Due to the heterogeneity in the methods  
207 used and the lack of standardized reporting across studies, a quantitative meta-  
208 analysis was not feasible. Consequently, the information from the included studies  
209 was summarized narratively, highlighting the key findings for each questionnaire.  
210 This narrative synthesis allows for a comprehensive overview of the reliability and  
211 validity findings, highlighting strengths and limitations of each questionnaire.

212

#### 213 *Analysis of length and readability of questionnaires*

214 To determine how quickly questionnaires could be answered and how easy it is to  
215 understand the questions, identified PAQs were analyzed for word count and  
216 readability level. The expected time the tool would take for self-administration (silent  
217 reading speed) and interviewer administration (spoken word speed) was calculated  
218 based on the respective questionnaire's word count and English reading speeds  
219 established by Brysbaert (24). The level of readability was calculated according to  
220 the Flesch-Kincaid formula, which was chosen because it is the most commonly used  
221 tool to calculate the readability level of written health information (25). The formula  
222 has two forms: the Flesch Reading-Ease-Score, and the Flesch–Kincaid Grade  
223 Level. The Flesch Reading-Ease-Score test produces a score from 0 to 100, and  
224 higher scores indicate material that is easier to read; lower scores mark passages  
225 that are more difficult to read. The Flesch–Kincaid Grade Level formula matches the  
226 text to the grade level achievement (number of years of education) required to  
227 understand the text. We applied both formulas for each questionnaire using an online  
228 calculator (26).

229

## 230 **Results**

### 231 *Study selection process*

232 The search across six databases resulted in 2,422 publications. After removing 1,255  
233 duplicates, 1,167 articles were screened based on title and abstract. 65 studies were  
234 found eligible for full text assessment. One recently published article (27) and one  
235 article identified while screening the reference lists of relevant publications (28)  
236 satisfied all eligibility criteria and were therefore included in the analysis.  
237 Subsequently, 33 full text articles were excluded due to the length of the  
238 questionnaire (n=14), the publication type (n=14), a lack of self-reporting on PA and

239 exercise (n=2), and a study design that did not consider validity and reliability (n=3).  
240 In total, 34 studies were included for data extraction and methodological quality  
241 assessment. A summary of the search results is presented in Figure 1.

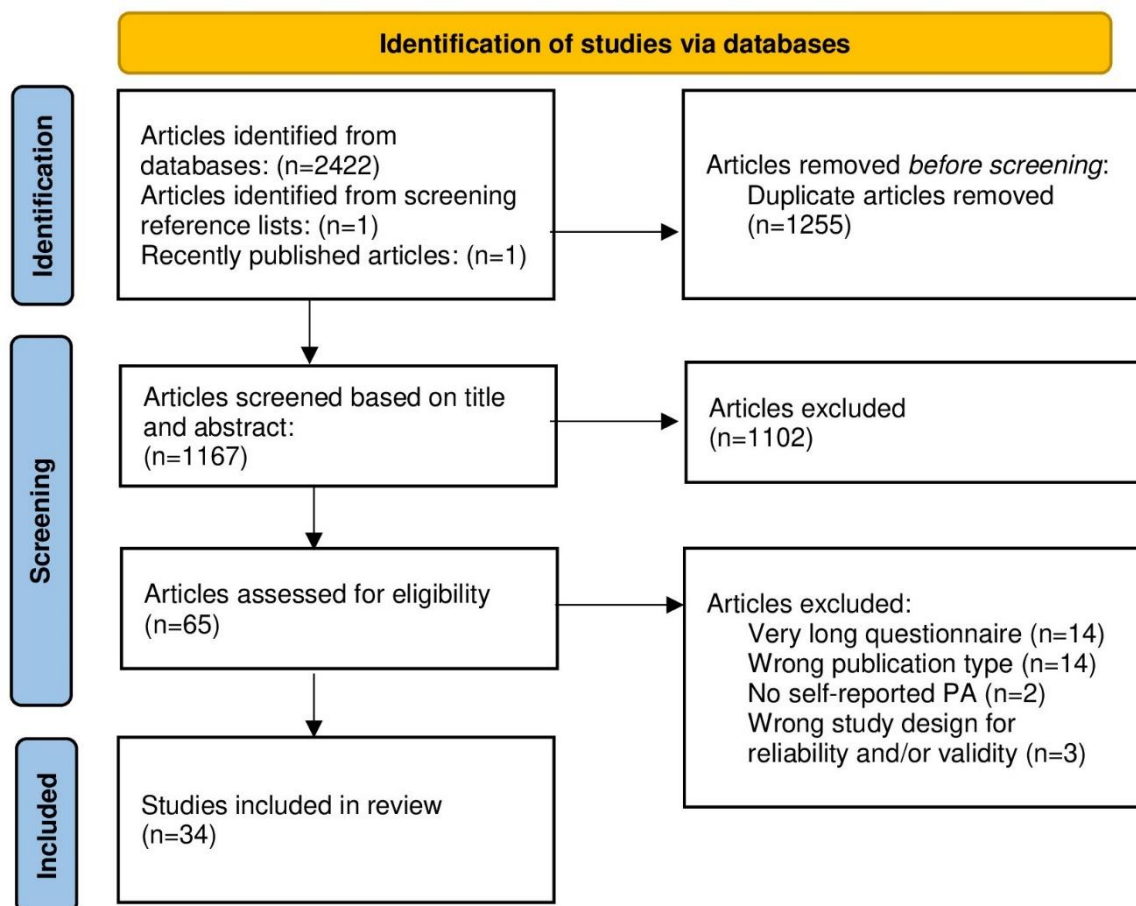

242

243 Figure 1. PRISMA flowchart of study eligibility (PA=physical activity)

244

#### 245 *Characteristics of included studies*

246 A summary of the characteristics of the 34 included studies is presented in Table 1.

247 The included studies were conducted in Western European countries (n=14), the

248 USA (n=10), Australia (n=5), Canada (n= 2), New Zealand (n=2), and Japan (n=1).

249 *[Table 1 about here]*

250 A total of 114,143 adults were assessed using the 31 unique brief PAQs (with sample  
251 sizes ranging from 9 to 39,379). In 25 studies, the sample consisted only of healthy  
252 adults, and nine studies also included specific populations such as older adults (29)  
253 (30) (31), overweight/obese adults (32, 33), as well as patients with rheumatoid  
254 arthritis (34), coronary heart disease (35) (36), and chronic obstructive pulmonary  
255 disease (37).

256 Thirty-one studies documented who completed the PAQ. In 16 studies, respondents  
257 filled out the questionnaire by themselves, and in 15 studies the PA level was  
258 collected from an interviewer reading a questionnaire.

259 Questionnaires asked for the amount of PA (n=6), the number of days per week with  
260 a sufficient amount of PA (n=4), general exercise participation (n= 3), self-reported  
261 activity compared with peers (n=2), or for respondents to choose a categorical  
262 descriptor of PA levels ranging from “inactive” to “very active” (n=16).

263 Seven of the included studies investigated the measurement properties of the Single  
264 Item Physical Activity Measure (SIPAM) (27, 30, 38, 39, 40, 41, 42), five were related  
265 to the Brief Physical Activity Assessment Tool (BPAAT) (37, 43, 44, 45, 46), and two  
266 to the Stanford Leisure-Time Activity Categorical Item (L-Cat) (32, 33). The other 28  
267 PAQs were assessed in a single study.

268

### 269 *Risk of bias assessment*

270 The average quality score of included studies was 11.75, with a range between 7 and  
271 17 (out of 18). Thirteen studies received 14 or more points, which can be considered  
272 a high methodological quality. In most of the studies, the aims and objectives, the  
273 process of the measurement properties investigation, the statistical analysis and the  
274 results were sufficiently described, and the study design was appropriate. However,

275 the included papers reported poorly on whether the examiners had enough  
276 experience with the tool and whether they were blinded to participant characteristics,  
277 previous findings, or other observed findings. Only four studies justified their choice  
278 of sample size. Additionally, many studies failed to consistently report reasons for  
279 dropout and characteristics of non-responders. Quality scores of the individual  
280 studies are reported in Table 1.

281

### 282 *Questionnaires' measurement properties*

283 A summary of the reliability, validity, and diagnostic test accuracy data found in the  
284 identified studies is presented in Table 2. Studies commonly use a number of  
285 different statistical analyses to define absolute (agreement between the two  
286 measurement tools) or relative (the degree to which the two measurement tools rank  
287 individuals in the same order) validity and reliability. These types of statistical  
288 analysis include correlations (Pearson's; Spearman's; interclass), regression, kappa  
289 statistics, and area under the receiver operating curve (AUC-ROC).

290 *[Table 2 about here]*

291 Eleven studies measured the reliability of brief PAQs. All of them used a test-retest  
292 procedure to measure the consistency of the PAQs. Statistical methods and test-  
293 retest intervals varied widely between studies. Overall, studies showed moderate to  
294 good reliability levels of the PAQs.

295 The validity of PAQs was assessed in 33 studies. As a "gold standard" for validation,  
296 13 studies used other PAQs, 15 studies validated brief PAQs against accelerometers  
297 or pedometers, and 11 studies compared results of the brief PAQs to other objective  
298 measurements, such as BMI (28, 32, 47, 48), VO<sub>2</sub> max (47, 49), or doubly labeled  
299 water (34). Validity coefficients were in general considerably lower than reliability

300 coefficients. The majority of results showed weak validity of brief PAQs against  
301 objective measurements and weak to moderate validity against other PAQs.

302

### 303 *Length and complexity of the questionnaires*

304 The texts of all questionnaires and information about their length and readability level  
305 are presented in Table 3. It should be noted that, while some PAQs were created and  
306 conducted in other languages, length and readability were calculated for the English  
307 versions.

308 *[Table 3 about here]*

309 Most of the assessed PAQs (n=26) can be read by in silence by the respondent or  
310 aloud by the interviewer in less than one minute. However, some questionnaires  
311 presented as “brief” by the authors of the identified studies contain a large amount of  
312 text and require more than one minute for reading: the Nordic Physical Activity  
313 Questionnaire (NPAQ) short, the Total Activity Measure (TAM), the Self-report Scale  
314 to Assess Habitual Physical Activity, the Stanford Leisure-Time Activity Categorical  
315 Item, and the Stanford Brief Activity Survey.

316 The calculation of the readability levels with the Flesch-Kincaid formula showed that  
317 only 17 out of 31 brief PAQs had readability levels of “easy to read” (n=9) or “plain  
318 English,” (n=8) and can be easily understood by the majority of the population (see  
319 Figure 2). Other questionnaires have long sentences and/or many complicated words  
320 (three syllables and more), making them difficult to read. Seven questionnaires  
321 scored as “difficult to read” and require college-level education; it is likely that people  
322 with lower education levels will find them hard to understand.

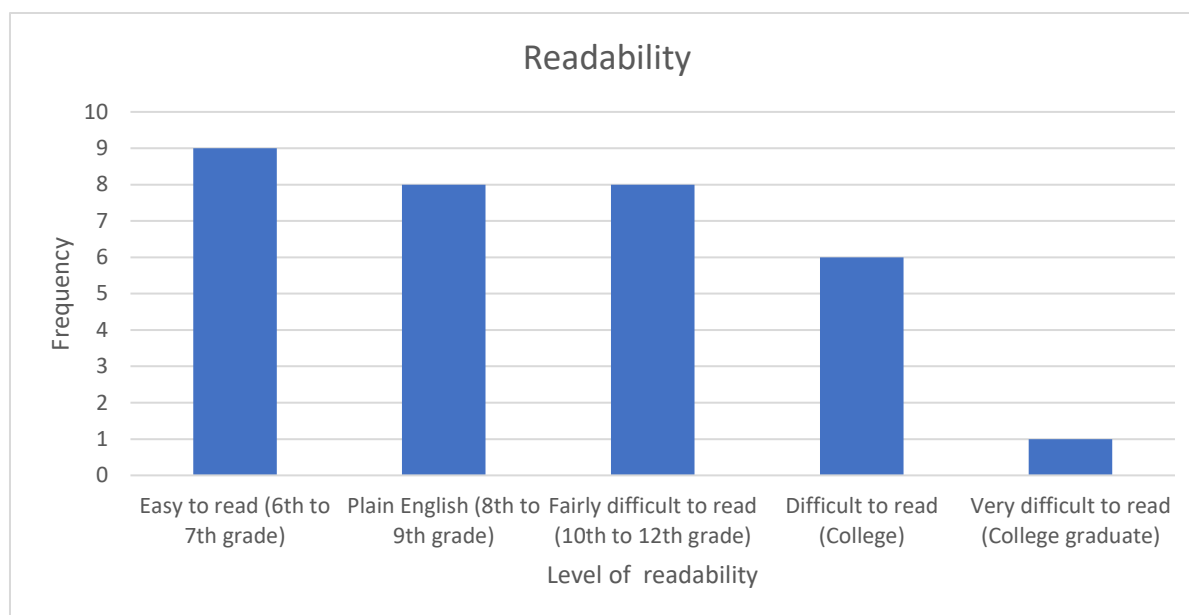

323

324 Figure 2. Readability levels for brief PA questionnaires (English language versions).

325

### 326 *Comparison of brief PAQs*

327 Data on both validity and reliability were only available for nine of the 31 assessed  
 328 PAQs. These brief PAQs were chosen for an in-depth comparison. Their summarized  
 329 measurement properties and linguistic characteristics are presented in Table 4.

330

331 Table 4. Comparison of the brief physical activity questionnaires by reliability, validity,  
 332 length and readability.

| Tool                                            | Reliability                  | Validity                      |                              | Word count                             | Readability                                                          |
|-------------------------------------------------|------------------------------|-------------------------------|------------------------------|----------------------------------------|----------------------------------------------------------------------|
|                                                 |                              | Against objective measurement | Against other PAQ            |                                        |                                                                      |
| Single Item Physical Activity Measure (SIPAM)   | Good (0,63-0,82)             | Poor to Good (0,22-0,81)      | Poor to Good (0,33-0,81)     | 63 – original<br>111 – parents version | Fairly difficult to read<br>Parents version - Very difficult to read |
| Brief Physical Activity Assessment Tool (BPAAT) | Moderate to good (0,53-0,72) | Poor to moderate (0,18-0,43)  | Moderate to good (0,45-0,64) | 106                                    | Difficult to read                                                    |

|                                                                      |                              |                              |                      |     |                          |
|----------------------------------------------------------------------|------------------------------|------------------------------|----------------------|-----|--------------------------|
| Three-Question Assessment                                            | Moderate to good (0,56-0,63) | Poor (0,24-0,31)             | Moderate (0,39-0,43) | 140 | Fairly difficult to read |
| Nordic physical activity questionnaire (NPAQ) - short (open ended) * | Good (0,82)                  | Poor (0,33)                  | NM                   | 237 | Difficult to read        |
| Total Activity Measure (Version 2)                                   | Good (0,82)                  | Poor (0,36-0,38)             | NM                   | 241 | Fairly difficult to read |
| Japan Collaborative Cohort (JACC) Questionnaire*                     | Moderate (0.39 - 0.56)       | NM                           | Moderate (0.43-0.60) | 90  | Plain English            |
| Relative PA Question (Compared to peers)                             | Moderate (0,56)              | Poor to moderate (0,28-0,57) | NM                   | 25  | Easy to read             |
| The Seven-level Single-Question Scale *                              | Good (0,7)                   | Poor (0,33)                  | NM                   | 144 | Fairly difficult to read |
| Absolute PA Question                                                 | Good (0,7)                   | Poor (0,1-0,33)              | NM                   | 34  | Fairly difficult to read |
| A single-item 5-point rating of usual PA (Usual PA Scale)            | Good (0,68-0,88)             | NM                           | Good (0,66)          | 147 | Plain English            |
| The Stanford Leisure-Time Activity Categorical Item (L-CAT)          | Good (0,64-0,8)              | Poor (0,36-0,38)             | NM                   | 331 | Plain English            |

333 \* = the study used not the English version of the questionnaire, PAQ=physical activity questionnaire

334

335 The Single Item Physical Activity Measure (SIPAM) uses a single question to assess  
336 the number of days per week on which 30 minutes or more of PA are performed  
337 (excluding housework and work-related PA). For this PAQ, the largest number of  
338 studies on validity and reliability were found. The SIPAM showed good reliability  
339 levels in all studies, however, results on validity varied considerably between studies  
340 – from poor to good – against both objective measurements and other subjective  
341 PAQs. Zwolinsky et al. (2015) also measured SIPAM’s ability to identify people that  
342 meet or do not meet WHO PA recommendations. The tool showed a low diagnostic  
343 capacity compared to the IPAQ. The agreement between the SIPAM and the IPAQ  
344 was low for identification of participants who meet WHO PA recommendations  
345 (kappa= 0.13, 95% CI 0.12 to 0.14) and moderate for the classification of inactive  
346 participants (kappa= 0.45, 95% CI 0.43 to 0.47) (42).



347 The Brief Physical Activity Assessment Tool (BPAAT) consists of two questions, one  
348 regarding the frequency and duration of vigorous PA and the other regarding  
349 moderate PA and walking performed in an individual's usual week. By combining the  
350 results of both questions (scores can range from 0 to 8), the subject can be classified  
351 as insufficiently (0–3 score) or sufficiently active ( $\geq 4$  score). Results of reviewed  
352 studies showed that the BPAAT has moderate to good levels of reliability and validity  
353 in comparison with other PAQs, however comparison with accelerometers identified  
354 only poor to moderate validity.

355 Smith et al. (2005) evaluated the Three-Question Assessment variant of the BPAAT  
356 which has separate questions about moderate PA and walking. The results of the  
357 study did not find a considerable difference in validity and reliability between the two-  
358 and three-question versions. One study also reported that more physicians preferred  
359 the two-question version (BPAAT) as it is shorter and therefore easier to use (Smith,  
360 2005).

361 The Nordic Physical Activity Questionnaire-short (NPAQ-short) includes one question  
362 about moderate to vigorous PA and a second question about vigorous PA. Danquah  
363 et al. (2018) compared open-ended and closed-ended questions with the open-  
364 ended version achieving better results. The open-ended version showed good  
365 reliability but performed similarly to other questionnaires, showing poor validity when  
366 compared against objective PA measures. The analyses showed that the  
367 questionnaire was one of the longest and was rated "difficult to read". The agreement  
368 with accelerometer data in identification of people that meet or do not meet the WHO  
369 PA recommendations was low ( $\kappa=0.42$ ).

370 The Total Activity Measures (TAM) includes three open-ended questions about  
371 strenuous, moderate, and mild PA. The revised second version, TAM2, asks about

372 the total time spent at each activity level over a 7-day period. The TAM2 showed  
373 good reliability when validated against objectively-measured PA. The word count was  
374 high at 241, and readability was rated as “fairly difficult”.

375 The Japan Collaborative Cohort (JACC) Questionnaire has three items. Two  
376 questions focus on leisure-time PA, i.e., time per week engaging in sport or PA (with  
377 options ranging from “little” to “at least 5 hours”), and frequency of engagement in  
378 sport over the past year (options from “seldom” to “at least twice a week”). The third  
379 question asks about daily walking patterns (options from “little” to “more than 1  
380 hour”). The questionnaire showed moderate reliability after one year and moderate  
381 validity when compared against a more in-depth interview by a trained researcher.  
382 The questions are 90 words in total and were rated as “plain English.”

383 The Relative PA Question is the shortest of the compared PAQs and has an easy  
384 readability level. It allows respondents to compare their level of PA with other people  
385 of the same age and to choose from five categories ranging from “much more active”  
386 to “much less active.” The questionnaire has a moderate reliability level and showed  
387 poor validity against objective measures.

388 The Absolute PA Question asked participants to choose what best describes their  
389 activity level from three options: (1) vigorously active for at least 30 minutes, three  
390 times per week; (2) moderately active at least three times per week; or (3) seldom  
391 active, preferring sedentary activities. The questionnaire is relatively short, but as  
392 most of the other brief PAQs, it showed high reliability and poor validity against  
393 objective measures.

394 The Seven-Level Single-Question Scale (SR-PA L7) requires respondents to assign  
395 themselves to a level ranging from “I do not move more than is necessary in my daily  
396 routines/chores” and “I participate in competitive sports and maintain my fitness

397 through regular training.” These seven items are supposed to categorize respondents  
398 as maintaining low, medium, or high PA. The SR-PA L7 showed poor validity when  
399 compared to objectively measured PA but good reliability. The scale is moderately  
400 long at 144 words and was rated as “fairly difficult to read.”

401 A single-item 5-point rating of usual PA (Usual PA Scale) includes descriptions of  
402 three PA levels: highly active, moderately active, and inactive. Respondents need to  
403 read a description of each category and identify their usual PA level from the list. The  
404 questionnaire’s readability level was ranked as “plain English,” and it showed good  
405 reliability and validity levels. However, validation was done only against another PAQ  
406 which is not well-known and requires further research.

407 The Stanford Leisure-Time Activity Categorical Item (L-CAT) is a single-item  
408 questionnaire that consists of six descriptive PA categories ranging from inactive to  
409 very active. Each category consists of one or two statements describing common  
410 activity patterns over the past month, differing in frequency, intensity, duration, and  
411 types of activity. The categories are described in “plain English,” but this made the  
412 questionnaire longer than the other questionnaires. The L-CAT showed high  
413 reliability but poor validity against pedometer and accelerometer validation.

414

## 415 **Discussion**

416 This review assessed the validity, reliability, and readability of brief PAQs for adults.  
417 To our knowledge, it is the first review focused specifically on brief PAQs and also  
418 the first to assess their readability. The sheer number of brief PAQs we identified  
419 (n=31) indicates a high research interest in such instruments. However, it also  
420 indicates a lack of harmonization when it comes to PA assessment using brief  
421 questionnaires.

422 Overall, most PAQs were reported to have poor or moderate validity. They showed  
423 higher validity levels against other self-reported tools than against objective PA  
424 measures. Although reliability is an important measurement property, it was  
425 assessed only in 11 studies. About half of all PAQs showed a moderate to good level  
426 of reliability. These results are in line with other reviews of PAQs (18, 19, 50, 51).

427 A significant difficulty in conducting this review was that the studies used different  
428 methods for validation, varying time-intervals between repeated measurements, and  
429 different statistical methods to analyze data. Complete data on validity and reliability  
430 were only available for nine PAQs, and only those could be compared in greater  
431 detail. All of these factors prevented a more detailed comparison of results across  
432 PAQs. In general, the methodological quality of the included studies was modest.  
433 The most common flaws were comparably small sample sizes, a lack of sample size  
434 justification, and a poor description of the validity and reliability assessment process.  
435 Additionally, most studies utilized convenience samples, making it impossible to  
436 assess if measurement properties would differ between adults with different levels of  
437 socioeconomic status and/or educational attainment.

438 Also, the included PAQs used different concepts of measuring PA, further  
439 complicating a direct comparison between instruments. For example, the SIPAM  
440 measures on how many days per week respondents perform 30 minutes or more of  
441 PA; the Absolute PAQ requires respondents to choose from several descriptions of  
442 different PA levels; and the Relative PA question asks them to compare their level of  
443 PA with peers. Some PAQs, such as the TAM, aim to assess the total volume of  
444 moderate-to-vigorous PA. Others focus on particular PA domains. And yet others  
445 assess only leisure-time PA. This variety can be partly explained by efforts to keep  
446 PAQs short at the price of excluding some PA dimensions (type, duration, intensity,

447 volume). However, it could also be interpreted as a lack of common understanding  
448 about which dimensions of PA should be assessed with brief PAQs. It should also be  
449 taken into account that none of the reviewed brief PAQs allowed for the  
450 measurement of whether a person fulfills the WHO physical activity  
451 recommendations (52).

452 All of the included studies were conducted in highly developed nations, and 23 of  
453 them took place in English-speaking countries. This most certainly biased the results,  
454 since terminology related to PA differs between languages, as do levels of literacy  
455 (53). Ultimately, to assess reliability and validity of PAQs, many more studies should  
456 be conducted in developing nations to obtain a more accurate assessment of their  
457 suitability for international surveillance systems. Certainly, in order to stimulate such  
458 research, funding opportunities need to be made available to research teams from  
459 such nations.

460 The results of this study point out that many PAQs have low readability levels. This is  
461 particularly disturbing when considering that most of these PAQs were tested in  
462 developed nations with comparatively high levels of literacy. Potentially, poor  
463 readability is related to the modest measurement properties that PAQs commonly  
464 come with. Questionnaires that are more readable or might even have been co-  
465 developed (54) with the intended population groups are likely to yield better  
466 measurement properties. This would also strengthen the case of integrating them  
467 into PA surveillance systems. However, at this point in time, there is a dearth of  
468 research relating PAQs and their measurement properties to readability. Advancing  
469 knowledge in this field would also benefit longer PA questionnaires (such as IPAQ  
470 and GPAQ) that are widely utilized in surveillance and potentially score low on  
471 readability as well.

472 This review comes with certain limitations. The search was limited to scientific  
473 databases, and only studies published in peer reviewed scientific journals were  
474 included. This can lead to a publication bias, as all other types of publications and  
475 gray literature were excluded. The varying measurement methods and conditions  
476 complicated the comparison of findings from different studies and limited data  
477 analysis to a narrative description of differences between tools. This led to more  
478 subjective results and greater difficulty in identifying the tools with the best  
479 measurement properties. It should be also taken into account that the Flesch-Kincaid  
480 readability formula was created for longer texts and not adapted for short  
481 questionnaires. Consequently, the readability levels of PAQs presented here should  
482 be interpreted with caution.

483

## 484 **Conclusion**

485 This systematic review sheds light on the validity, reliability, and readability of short  
486 PAQs. Results indicate that additional research is needed, notably regarding their  
487 reliability and validity, their readability, and their applicability to non-English speaking  
488 and/or developing countries.

489 Recent years have seen a shift from self-report questionnaires towards objective  
490 measures in PA surveillance. This shift has been partially motivated by the  
491 persistently modest measurement properties of PAQs, as well as technological  
492 advancements in the quality and affordability of accelerometers and other PA  
493 measurement tools. However, objective PA assessment comes with its own set of  
494 limitations (55), and self-report and objective measures have been described as  
495 measuring entirely different parameters. Right now, it seems unclear what the future  
496 for PA surveillance might hold and if brief PAQs will continue to play a role.

497 In this regard, the key merit of short PAQs is that they require substantially less time  
498 to complete than the established PA surveillance questionnaires (GPAQ, IPAQ, and  
499 EHIS-PAQ). This makes them highly appealing for use in surveillance systems. In  
500 order for them to be included in existing systems, more studies would need to  
501 investigate how they compare to longer PAQs. Potentially, if their validity and  
502 reliability are found to be at a comparable level, we might see surveillance systems  
503 gradually shift from longer towards briefer PAQs.

504

505 **List of abbreviations:**

506 BPAAT: Brief Physical Activity Assessment Tool

507 EHIS-PAQ: European Health Interview Survey Physical Activity Questionnaire

508 GPAQ: Global Physical Activity Questionnaire

509 IPAQ: International Physical Activity Questionnaire

510 JACC: Japan Collaborative Cohort Questionnaire

511 L-CAT: The Stanford Leisure-Time Activity Categorical Item

512 NPAQ-short: The Nordic Physical Activity Questionnaire-short

513 PA: physical activity

514 PAQ: physical activity questionnaire

515 SIPAM: Single Item Physical Activity Measure

516 SR-PA L7: The Seven-level Single-Question Scale for Self-Reported Leisure Time  
517 Physical Activity

518 TAM: Total Activity Measure

519

520 **Declarations**

521 Ethics approval and consent to participate: Not applicable.

522 Consent for publication: Not applicable.



523 Availability of data and materials: Data sharing is not applicable to this article as no  
524 datasets were generated or analysed during the current study.

525 Competing interests: The authors declare that they have no competing interests.

526 Funding: This research was conducted as part of projects funded by the German  
527 Federal Ministry of Health (ZMI5-2522WHO001, ZMI5-2523WHO001). The ministry  
528 was neither involved in writing this manuscript nor in the decision to submit the article  
529 for publication. Furthermore, we acknowledge financial support by Deutsche  
530 Forschungsgemeinschaft and Friedrich-Alexander-Universität Erlangen-Nürnberg  
531 within the funding programme "Open Access Publication Funding".

532 Authors' contributions: AT, KA-O and IR conceptualized the study. AT conducted the  
533 literature search. AT, RA, RGP, and TA performed abstract/title screening, full-text  
534 selection, data extraction, and quality assessment. AT with support from KA-O, SM  
535 and PG prepared a draft of the manuscript. All authors critically reviewed the draft  
536 and approved the final manuscript.

537 Acknowledgements: Not applicable.

538

#### 539 References:

- 540 1. McPhee JS, French DP, Jackson D, Nazroo J, Pendleton N, Degens H. Physical activity  
541 in older age: perspectives for healthy ageing and frailty. *Biogerontology*. 2016;17(3):567-80.
- 542 2. World Health Organization. Guidelines on physical activity and sedentary behaviour.  
543 Geneva: World Health Organization; 2020.
- 544 3. Welk G. Physical activity assessments for health-related research: *Human Kinetics*;  
545 2002.
- 546 4. Centers for Disease Control and Prevention. Behavioral Risk Factor Surveillance  
547 System Survey Questionnaire. Atlanta, Georgia: U.S. Department of Health and Human  
548 Services, Centers for Disease Control and Prevention; 2021.
- 549 5. World Health Organization. WHO STEPS Surveillance Manual: The WHO STEPwise  
550 approach to noncommunicable disease risk factor surveillance. 2020.
- 551 6. Finger JD, Tafforeau J, Gisle L, Oja L, Ziese T, Thelen J, et al. Development of the  
552 European Health Interview Survey - Physical Activity Questionnaire (EHIS-PAQ) to monitor  
553 physical activity in the European Union. *Arch Public Health*. 2015;73:59.
- 554 7. Sallis JF, Saelens BE. Assessment of physical activity by self-report: status, limitations,  
555 and future directions. *Research quarterly for exercise and sport*. 2000;71:1-14.
- 556 8. Sember V, Meh K, Sorić M, Starc G, Rocha P, Jurak G. Validity and Reliability of  
557 International Physical Activity Questionnaires for Adults across EU Countries: Systematic  
558 Review and Meta Analysis. *International journal of environmental research and public  
559 health*. 2020;17(19):7161.
- 560 9. Bull FC, Maslin TS, Armstrong T. Global physical activity questionnaire (GPAQ): nine  
561 country reliability and validity study. *J Phys Act Health*. 2009;6(6):790-804.



- 562 10. Craig CL, Marshall AL, Sjöström M, Bauman AE, Booth ML, Ainsworth BE, et al.  
563 International physical activity questionnaire: 12-country reliability and validity. *Medicine and*  
564 *science in sports and exercise*. 2003;35(8):1381–95.
- 565 11. Lee PH, J. MD, Lam TH, Stewart SM. Validity of the International Physical Activity  
566 Questionnaire Short Form (IPAQ-SF): a systematic review. *The international journal of*  
567 *behavioral nutrition and physical activity*. 2011;8:115.
- 568 12. Baumeister SE, Ricci C, Kohler S, Fischer B, Topfer C, Finger JD, et al. Physical activity  
569 surveillance in the European Union: reliability and validity of the European Health Interview  
570 Survey-Physical Activity Questionnaire (EHIS-PAQ). *The international journal of behavioral*  
571 *nutrition and physical activity*. 2016;13:61.
- 572 13. Ware J, Jr., M. K, Keller SD. A 12-Item Short-Form Health Survey: construction of  
573 scales and preliminary tests of reliability and validity. *Medical Care*. 1996;34(3):220-33.
- 574 14. Rolstad S, Adler J, Rydén A. Response burden and questionnaire length: is shorter  
575 better? A review and meta-analysis. *Value in health : the journal of the International Society*  
576 *for Pharmacoeconomics and Outcomes Research*. 2011;14(8):1101-8.
- 577 15. Grabeel KL, Russomanno J, Oelschlegel S, Tester E, Heidel RE. Computerized versus  
578 hand-scored health literacy tools: a comparison of Simple Measure of Gobbledygook  
579 (SMOG) and Flesch-Kincaid in printed patient education materials. *J Med Libr Assoc*.  
580 2018;106(1):38-45.
- 581 16. Altschuler A, Picchi T, Nelson M, Rogers JD, Hart J, Sternfeld B. Physical activity  
582 questionnaire comprehension: lessons from cognitive interviews. *Med Sci Sports Exerc*.  
583 2009;41(2):336-43.
- 584 17. Wallace LS, Lennon ES. American Academy of Family Physicians patient education  
585 materials: Can patients read them? *Family Medicine*. 2004;36(8):571-4.
- 586 18. van Poppel MN, Chinapaw MJ, Mokkink LB, van Mechelen W, Terwee CB. Physical  
587 activity questionnaires for adults: a systematic review of measurement properties. *Sports*  
588 *Medicine (Auckland, N Z)*. 2010;40(7):565-600.
- 589 19. Helmerhorst HJH, S. B, Warren J, Besson H, Ekelund U. A systematic review of  
590 reliability and objective criterion-related validity of physical activity questionnaires. *The*  
591 *international journal of behavioral nutrition and physical activity*. 2012;9:103.
- 592 20. Page MJ, McKenzie JE, Bossuyt PM, Boutron I, Hoffmann TC, Mulrow CD, et al. The  
593 PRISMA 2020 statement: an updated guideline for reporting systematic reviews. *BMJ*.  
594 2021;372:n71.
- 595 21. Prinsen CAC, Mokkink LB, Bouter LM, Alonso J, Patrick DL, de Vet HCW, et al. COSMIN  
596 guideline for systematic reviews of patient-reported outcome measures. *Quality of Life*  
597 *Research : An International Journal of Quality of Life Aspects of Treatment, Care, and*  
598 *Rehabilitation*. 2018;27(5):1147-57.
- 599 22. Downes MJ, Brennan ML, Williams HC, Dean RS. Development of a critical appraisal  
600 tool to assess the quality of cross-sectional studies (AXIS). *BMJ Open*. 2016;6(12):e011458.
- 601 23. Williams MA, McCarthy CJ, Chorti A, Cooke MW, Gates S. A systematic review of  
602 reliability and validity studies of methods for measuring active and passive cervical range of  
603 motion. *Journal of Manipulative and Physiological Therapeutics*. 2010;33(2):138-55.
- 604 24. Brysbaert M. How many words do we read per minute? A review and meta-analysis  
605 of reading rate. *Journal of Memory and Language*. 2019;109.
- 606 25. Wang LW, Miller MJ, Schmitt MR, Wen FK. Assessing readability formula differences  
607 with written health information materials: application, results, and recommendations. *Res*  
608 *Social Adm Pharm*. 2013;9(5):503-16.

- 609 26. charactercalculator.com. Flesch Reading Ease 2023 [Available from:  
610 <https://charactercalculator.com/flesch-reading-ease/>.  
611 27. Bauman AE, Richards JA. Understanding of the Single-Item Physical Activity Question  
612 for Population Surveillance. *Journal of Physical Activity and Health*. 2022;19(10):681-6.  
613 28. Schechtman KB, Barzilai B, Rost K, B. FJE. Measuring physical activity with a single  
614 question. *American journal of public health*. 1991;81(6):771-3.  
615 29. Gill DP, Jones GR, Zou G, Speechley M. Using a single question to assess physical  
616 activity in older adults: A reliability and validity study. *BMC Medical Research Methodology*.  
617 2012;12(20).  
618 30. Macdonald HM, Nettlefold L, Bauman A, Sims-Gould J, McKay HA. Pragmatic  
619 Evaluation of Older Adults' Physical Activity in Scale-Up Studies: Is the Single-Item Measure a  
620 Reasonable Option? *Journal of Aging and Physical Activity*. 2022;30(1):25-32.  
621 31. Portegijs E, Sipilä S, Viljanen A, Rantakokko M, Rantanen T. Validity of a single  
622 question to assess habitual physical activity of community-dwelling older people.  
623 *Scandinavian Journal of Medicine & Science in Sports*. 2017;27(11):1423-30.  
624 32. Kiernan M, Schoffman DE, Lee K, Brown SD, Fair JM, Perri MG, et al. The stanford  
625 leisure-time activity categorical item (L-Cat): A single categorical item sensitive to physical  
626 activity changes in overweight/obese women. *International Journal of Obesity*.  
627 2013;37(12):1597-602.  
628 33. Ross KM, Leahey TM, Kiernan M. Validation of the Stanford Leisure-Time Activity  
629 Categorical Item (L-Cat) using armband activity monitor data. *Obesity science & practice*.  
630 2018;4(3):276-82.  
631 34. Johansson G, Westerterp KR. Assessment of the physical activity level with two  
632 questions: Validation with doubly labeled water. *International Journal of Obesity*.  
633 2008;32(6):1031-3.  
634 35. Blomqvist A, Bäck M, Klompstra L, Strömberg A, Jaarsma T. Utility of single-item  
635 questions to assess physical inactivity in patients with chronic heart failure. *ESC Heart Fail*.  
636 2020;7(4):1467-76.  
637 36. Orrell A, Doherty P, Miles J, Lewin R. Development and validation of a very brief  
638 questionnaire measure of physical activity in adults with coronary heart disease. *European*  
639 *Journal of Cardiovascular Prevention and Rehabilitation*. 2007;14(5):615-23.  
640 37. Cruz J, Jácome C, Oliveira A, Paixão C, Rebelo P, Flora S, et al. Construct validity of the  
641 brief physical activity assessment tool for clinical use in COPD. *The Clinical Respiratory*  
642 *Journal*. 2021;15(5):530-9.  
643 38. Hamilton K, White KM, Cuddihy T. Using a single-item physical activity measure to  
644 describe and validate parents' physical activity patterns. *Research Quarterly for Exercise and*  
645 *Sport*. 2012;83(2):340-5.  
646 39. Milton K, Bull FC, Bauman A. Reliability and validity testing of a single-item physical  
647 activity measure. *British Journal of Sports Medicine*. 2011;45(3):203-8.  
648 40. Milton K, Clemes S, Bull F. Can a single question provide an accurate measure of  
649 physical activity? *British Journal of Sports Medicine*. 2013;47(1):44-8.  
650 41. O'Halloran P, Kingsley M, Nicholson M, Staley K, Randle E, Wright A, et al.  
651 Responsiveness of the single item measure to detect change in physical activity. *PLoS ONE*.  
652 2020;15(6).  
653 42. Zwolinsky S, McKenna J, Pringle A, Widdop P, Griffiths C. Physical activity assessment  
654 for public health: Efficacious use of the single-item measure. *Public Health*.  
655 2015;129(12):1630-6.

- 656 43. Marshall AL, Smith BJ, Bauman AE, Kaur S. Reliability and validity of a brief physical  
657 activity assessment for use by family doctors. *British Journal of Sports Medicine*.  
658 2005;39(5):294-7.
- 659 44. Puig Ribera A, Peña Chimenis Ò, Romaguera Bosch M, Duran Bellido E, Heras Tebar A,  
660 Solà Gonfaus M, et al. How to identify physical inactivity in Primary Care: Validation of the  
661 Catalan and Spanish versions of 2 short questionnaires. *Atencion Primaria*. 2012;44(8):485-  
662 93.
- 663 45. Puig-Ribera A, Martín-Cantera C, Puigdomenech E, Real J, Romaguera M, Magdalena-  
664 Belio JF, et al. Screening physical activity in family practice: Validity of the Spanish version of  
665 a brief physical activity questionnaire. *PLoS ONE*. 2015;10(9).
- 666 46. Smith BJ, Marshall AL, Huang N. Screening for physical activity in family practice:  
667 Evaluation of two brief assessment tools. *American Journal of Preventive Medicine*.  
668 2005;29(4):256-64.
- 669 47. Gionet NJ, Godin G. Self-Reported Exercise Behavior of Employees - A Validity Study.  
670 *Journal of Occupational and Environmental Medicine*. 1989;31(12):969-73.
- 671 48. Li S, Carlson E, Holm K. Validation of a single-item measure of usual physical activity.  
672 *Perceptual and Motor Skills*. 2000;91(2):593-602.
- 673 49. Graff-Iversen S, Anderssen SA, Holme IM, Jenum AK, Raastad T. Two short  
674 questionnaires on leisure-time physical activity compared with serum lipids, anthropometric  
675 measurements and aerobic power in a suburban population from Oslo, Norway. *European*  
676 *journal of epidemiology*. 2008;23(3):167-74.
- 677 50. Forsén L, Loland NW, Vuillemin A, Chinapaw MJ, van Poppel MN, Mokkink LB, et al.  
678 Self-administered physical activity questionnaires for the elderly: a systematic review of  
679 measurement properties. *Sports Medicine*. 2010;40(7):601-23.
- 680 51. Smith TO, McKenna MC, Salter C, Hardeman W, Richardson K, Hillsdon M, et al. A  
681 systematic review of the physical activity assessment tools used in primary care. *Family*  
682 *Practice*. 2017;34(4):384-91.
- 683 52. Organization WH. Guidelines on physical activity and sedentary behaviour. Geneva:  
684 World Health Organization; 2020.
- 685 53. Levin-Zamir D, Leung AYM, Dodson S, Rowlands G. Health Literacy in Selected  
686 Populations: Individuals, Families, and Communities from the International and Cultural  
687 Perspective. *Studies in Health Technology and Informatics*. 2017;240:392-414.
- 688 54. Marsilio M, Fusco F, Gheduzzi E, Guglielmetti C. Co-Production Performance  
689 Evaluation in Healthcare. A Systematic Review of Methods, Tools and Metrics. *International*  
690 *Journal of Environmental Research and Public Health*. 2021;18(7).
- 691 55. Hankinson A. Association of activity and chronic disease risk factors: utility and  
692 limitations of objectively measured physical activity data. *Journal of the American Dietetic*  
693 *Association*. 2008;108(6):945-7.
- 694 56. Ball TJ, Joy EA, Goh TL, Hannon JC, Gren LH, Shaw JM. Validity of two brief primary  
695 care physical activity questionnaires with accelerometry in clinic staff. *Primary Health Care*  
696 *Research & Development*. 2015;16(1):100-8.
- 697 57. Cruz J, Jácome C, Oliveira A, Paixão C, Rebelo P, Flora S, et al. Construct validity of the  
698 brief physical activity assessment tool for clinical use in COPD. *Clin Respir J*. 2021;15(5):530-  
699 9.
- 700 58. Danquah IH, Petersen CB, Skov SS, Tolstrup JS. Validation of the NPAQ-short - A brief  
701 questionnaire to monitor physical activity and compliance with the WHO recommendations.  
702 *BMC Public Health*. 2018;18(1).

- 703 59. Hyvärinen M, Sipilä S, Kulmala J, Hakonen H, Tammelin TH, Kujala UM, et al. Validity  
704 and reliability of a single question for leisure-time physical activity assessment in middle-  
705 aged women. *Journal of Aging and Physical Activity*. 2020;28(2):231-41.
- 706 60. Iwai N, Hisamichi S, Hayakawa N, Inaba Y, Nagaoka T, Sugimori H, et al. Validity and  
707 reliability of single-item questions about physical activity. *Journal of Epidemiology*.  
708 2001;11(5):211-8.
- 709 61. Jackson AW, Morrow JR, Jr., Bowles HR, Fitzgerald SJ, Blair SN. Construct validity  
710 evidence for single-response items to estimate physical activity levels in large sample  
711 studies. *Research Quarterly for Exercise and Sport*. 2007;78(2):24-31.
- 712 62. Moreno-Llamas A, García-Mayor J, De la Cruz-Sánchez E. Concurrent and convergent  
713 validity of a single, brief question for physical activity assessment. *International Journal of*  
714 *Environmental Research and Public Health*. 2020;17(6):1989.
- 715 63. Rose SB, Elley CR, Lawton BA, Dowell AC. A single question reliably identifies  
716 physically inactive women in primary care. *The New Zealand Medical Journal*.  
717 2008;121(1268):U2897.
- 718 64. Taylor-Piliae RE, Norton LC, Haskell WL, Mahbouda MH, Fair JM, Iribarren C, et al.  
719 Validation of a new brief physical activity survey among men and women aged 60-69 years.  
720 *American Journal of Epidemiology*. 2006;164(6):598-606.
- 721 65. Webster S, Khan A, Nitz JC. A brief questionnaire is able to measure population  
722 physical activity levels accurately: A comparative validation study. *Journal of Clinical*  
723 *Gerontology and Geriatrics*. 2011;2(3):83-7.
- 724 66. Weiss TW, Slater CH, Green LW, Kennedy VC, Albright DL, Wun CC. The validity of  
725 single-item, self-assessment questions as measures of adult physical activity. *Journal of*  
726 *Clinical Epidemiology*. 1990;43(11):1123-9.
- 727 67. Yore MM, Bowles HR, Ainsworth BE, Macera CA, Kohl HW, III. Single versus multiple  
728 item questions on occupational physical activity. *Journal of Physical Activity and Health*.  
729 2006;3(1):102-11.
- 730 68. Bauman AE, Richards JA. Understanding of the Single-Item Physical Activity Question  
731 for Population Surveillance. *Journal of Physical Activity and Health*. 2022.
- 732

**Table 1. Studies overview.**

| First author, year       | Country     | Questionnaire                                     | Population assessed                         | Person conducting assessment (self or interview) | Measurement properties                          | Measures to compare validity                                            | Reliability test/retest interval | Quality assessment score |
|--------------------------|-------------|---------------------------------------------------|---------------------------------------------|--------------------------------------------------|-------------------------------------------------|-------------------------------------------------------------------------|----------------------------------|--------------------------|
| Ball, 2015 (56)          | USA         | PAVS and SNAP                                     | 45 adults (clinic staff)                    | Interviewer                                      | Validity                                        | Accelerometer                                                           | NM                               | 13                       |
| Bauman, 2022 (27)        | New Zealand | SI-days (Bauman, 2022 Question)                   | 13887 adults                                | Interviewer                                      | Validity                                        | IPAQ, single question hours of PA per week                              | NM                               | 11                       |
| Blomqvist, 2020 (35)     | Sweden      | SR-1 and SR-2                                     | 106 adults with chronic heart failure       | Responder                                        | Validity, Sensitivity, Specificity              | Accelerometer                                                           | NM                               | 12                       |
| Cruz, 2021 (57)          | Portugal    | BPAAT                                             | 110 adults with COPD                        | Responder                                        | Validity, Sensitivity, Specificity              | Accelerometer                                                           | NM                               | 13                       |
| Danquah, 2018 (58)       | Denmark     | NPAQ-short open-ended and NPAQ-short closed-ended | 122 adults                                  | Responder                                        | Validity, Reliability, Sensitivity, Specificity | Accelerometer                                                           | 2 weeks                          | 15                       |
| Gill 2012 (29)           | USA         | Absolute PA Question and Relative PA Question     | 159 older adults (mean age 80 years +- 3.9) | Interviewer                                      | Validity, Reliability                           | Clinical assessment of balance, gait, fear of falling, etc.             | 7 days                           | 14                       |
| Gionet, 1989 (47)        | Canada      | GCSI and Elaborative Exercise Questionnaire       | 551 adults                                  | Interviewer                                      | Validity                                        | VO2max, BMI, ME                                                         | NM                               | 11                       |
| Graff-Iversen, 2008 (49) | Norway      | Gothenburg instrument, CONOR Instrument           | 1497 adults                                 | Interviewer                                      | Validity                                        | IPAQ-L, VO2max, BMI, Triglycerides, HDL-Cholesterol, Waist-to-hip ratio | 3 Years                          | 10                       |
| Hamilton, 2012 (38)      | Australia   | SIPAM - Parent Version                            | 458 adults pedometer n=30                   | Interviewer                                      | Validity                                        | Pedometer, 7-day PAR                                                    | NM                               | 12                       |

|                          |             |                               |                                                            |                   |                                    |                                                                                        |           |    |
|--------------------------|-------------|-------------------------------|------------------------------------------------------------|-------------------|------------------------------------|----------------------------------------------------------------------------------------|-----------|----|
| Hyvärinen, 2020 (59)     | Finland     | SR-PA L7                      | 795 adult women                                            | Self-administered | Validity, Reliability              | Accelerometer                                                                          | 120 days  | 14 |
| Iwai, 2001 (60)          | Japan       | JACC Questionnaire            | 1,730 adults for validity and 1,075 adults for reliability | Interviewer       | Validity, Reliability              | Interview similar to the Minnesota LTPA questionnaire                                  | 1 Year    | 13 |
| Jackson, 2007 (61)       | USA         | PA5, PA8                      | 687 Adults                                                 | NR                | Validity                           | Clinical assessment, maximal TT and MHPW                                               | NM        | 10 |
| Johansson, 2008 (34)     | Netherlands | WLPAQ                         | 9 adults with rheumatoid arthritis                         | Self-administered | Validity                           | DLW                                                                                    | NM        | 7  |
| Kiernan, 2013 (32)       | USA         | L-CAT                         | 267 overweight/obese women                                 | Self-administered | Validity, Reliability              | Pedometer and BMI                                                                      | 2-6 Weeks | 11 |
| Li, 2000 (48)            | USA         | Usual PA Scale                | 188 adult women                                            | Self-reported     | Validity                           | Sturgeon 1993 PAQ, BMI, psychosomatic symptoms, perimenopause-related quality of life. | 14 days   | 12 |
| Macdonald, 2022 (30)     | Canada      | SIPAM                         | 205 older adults (60 year and older)                       | Self-reported     | Validity                           | CHAMPS questionnaire                                                                   | NM        | 13 |
| Marshall, 2004 (43)      | Australia   | BPAAT                         | 75 adults                                                  | Interview         | Validity, Reliability              | CSA Accelerometer                                                                      | 7 days    | 13 |
| Milton, 2011 (39)        | UK          | SIPAM, SIPAM - month          | 480 adults                                                 | Self-reported     | Validity, Reliability              | SIPAM - GPAQ, SIPAM - month - APS                                                      | 7 days    | 14 |
| Milton, 2013 (40)        | UK          | SIPAM                         | 66 adults                                                  | Self-reported     | Validity, Specificity, Sensitivity | Accelerometer                                                                          | NM        | 12 |
| Moreno-Llamas, 2020 (62) | Spain       | Eurobarometer Survey Question | 39,379 adults                                              | Self-reported     | Validity                           | IPAQ                                                                                   | NM        | 7  |
| O'Halloran, 2020 (41)    | Australia   | SIPAM                         | 120 adults                                                 | NR                | Reliability Validity,              | Accelerometer                                                                          | NM        | 14 |

|                             |                |                                                                 |                                                                      |                       |                                          |                                                                                                                           |            |    |
|-----------------------------|----------------|-----------------------------------------------------------------|----------------------------------------------------------------------|-----------------------|------------------------------------------|---------------------------------------------------------------------------------------------------------------------------|------------|----|
|                             |                |                                                                 |                                                                      |                       | specificity,<br>sensitivity              |                                                                                                                           |            |    |
| Orrell, 2007<br>(36)        | UK             | TAM1<br>TAM2                                                    | 73 adults with CHD                                                   | Questionnaires        | Validity,<br>Reliability                 | Accelerometer                                                                                                             | 7 days     | 15 |
| Portegijs,<br>2017 (31)     | Finland        | Self-report scale to assess<br>habitual physical activity       | 848 adults aged<br>75-90 years<br>(174 for<br>accelerometer<br>data) | Interviewer           | Validity                                 | Accelerometer<br>15-item life space<br>assessment<br>Walking difficulty question<br>Short Physical Performance<br>Battery |            | 12 |
| Puig Ribera,<br>2012 (44)   | Spain          | Catalonian and Spanish<br>versions of BPAAT                     | 105 adults                                                           | Interview             | Validity,<br>Reliability                 | IPAQ-SF                                                                                                                   | 14-28 Days | 15 |
| Puig-Ribera,<br>2015 (45)   | Spain          | Spanish BPAAT                                                   | 1184 adults                                                          | Interviewer           | Validity                                 | 7-day Physical Activity Recall<br>(7DPAR)<br>Accelerometer                                                                | NM         | 16 |
| Rose, 2008<br>(63)          | New<br>Zealand | Single-item screening<br>question                               | 1171 women                                                           | Interviewer           | Validity,<br>Sensitivity,<br>Specificity | New Zealand Physical Activity<br>Questionnaire - Long Form<br>(NZPAQ-LF)                                                  | NM         | 11 |
| Ross, 2018<br>(33)          | USA            | L-CAT                                                           | 76 adults with<br>obesity                                            | Responder<br>(Online) | Validity,<br>Sensitivity,<br>Specificity | Accelerometer                                                                                                             | NM         | 15 |
| Schechtman,<br>1991 (28)    | USA            | St. Louis Working Hearts<br>Program single exercise<br>question | 1004 adults                                                          | NR                    | Validity                                 | BMI, HDL Cholesterol,<br>oxygen capacity                                                                                  | NM         | 7  |
| Smith, 2005<br>(46)         | Australia      | BPAAT<br>3QA                                                    | 509 adults                                                           | Interviewer           | Validity,<br>Reliability                 | Active Australia<br>Questionnaire,<br>Accelerometer                                                                       | 3 days     | 17 |
| Taylor-Piliae,<br>2006 (64) | USA            | SBAS                                                            | 1,010 adults                                                         | Self-<br>administered | Validity                                 | Stanford Seven Day Physical<br>Activity Recall, cardiovascular<br>disease risk biomarkers                                 | NM         | 14 |

|                      |           |                                                                     |               |                   |                                       |                                       |    |    |
|----------------------|-----------|---------------------------------------------------------------------|---------------|-------------------|---------------------------------------|---------------------------------------|----|----|
| Webster, 2011 (65)   | Australia | The six-point scale                                                 | 100 adults    | Self-administered | Validity                              | IPAQ HAP Questionnaire                | NM | 14 |
| Weiss, 1990 (66)     | USA       | Job Related Activity Main Daily Activity Compared to Peers Question | 33,630 adults | Interview         | Validity                              | Continuous energy expenditure measure | NM | 10 |
| Yore, 2006 (67)      | USA       | BRFSS                                                               | 5,847 adults  | Interview         | Validity                              | OPAQ                                  | NM | 12 |
| Zwolinsky, 2015 (42) | England   | SIPAM                                                               | 7650 adults   | Self-reported     | % Agreement, Sensitivity, Specificity | IPAQ                                  | NM | 14 |

NM=not measured, NR=not reported, PAVS=Physical Activity and Vital Signs, SNAP=Speedy Nutrition and Physical Activity Assessment, SI-Days=single-item day question, IPAQ= International Physical Activity Questionnaire, SR-1=Self-report on activity 1, SR-2=Self-report on activity 2, BPAAT= Brief Physical Activity Assessment Tool, COPD= chronic obstructive pulmonary disorder, NPAQ=Nordic physical activity questionnaire, PA=physical activity, GCSSI=Godin and coworkers simple self-administered instrument, BMI=body mass index, ME=muscular endurance, CONOR=Cohort of Norway, IPAQ-L=International Physical Activity Questionnaire – Long Form, HDL=high density lipoproteins, SIPAM=Single Item Physical Activity Measure, PAR=physical activity recall, SR-PA L7=The Seven-level Single-Question Scale for Self-Reported Leisure Time Physical Activity, JACC=Japan Collaborative Cohort, LTPA=leisure time physical activity, PA5=single-response from five descriptors, PA8=single-response from eight descriptors, WLPAQ=Work Leisure Physical Activity Questionnaire, DLW=Doubly-labeled water, L-CAT=The Stanford Leisure-Time Activity Categorical Item, PAQ=physical activity questionnaire, CHAMPS=Community Health Activities Model Program for Seniors physical activity self-report questionnaire, CSA=Computer Science Application, GPAQ=Global Physical Activity Questionnaire, APS=Active People Survey, TAM=Total Activity Measure, CHD=Coronary Heart Disease, 7DPAR=7-day physical activity recall, NZPAQ-LF=New Zealand physical activity questionnaire-Long form, SBAS=Stanford Brief Activity Survey, HAP=Human activity profile, BRFSS=Behavioral Risk Factor Surveillance System, OPAQ=Occupational Physical Activity Questionnaire



**Table 2. Summary of measurement properties.**

| Questionnaire                                   | Reliability                                       | Validity                                                                                                                    | Sensitivity                                                                                      | Specificity                                                                                      | Identification of the population meeting WHO criteria for PA                                                                                             |
|-------------------------------------------------|---------------------------------------------------|-----------------------------------------------------------------------------------------------------------------------------|--------------------------------------------------------------------------------------------------|--------------------------------------------------------------------------------------------------|----------------------------------------------------------------------------------------------------------------------------------------------------------|
| Number days of sufficient amount of PA per week |                                                   |                                                                                                                             |                                                                                                  |                                                                                                  |                                                                                                                                                          |
| Physical Activity and Vital Signs (PAVS) (56)   | NM                                                | Total weekly min MVPA<br>Bout PA rP=0.50<br>Non-Bout rP=0.33<br>No. of days >30min MVPA<br>Bout rP=0.52<br>Non-bout rP=0.30 | NM                                                                                               | NM                                                                                               | kappa=0.46 (95%CI: 0.04-0.89)                                                                                                                            |
| Single Item Physical Activity Measure (SIPAM)   | kappa=0.63 (95%CI: 0.54-0.72)<br>Rho=0.72<br>(39) | Rho=0.53<br>(39)                                                                                                            |                                                                                                  |                                                                                                  |                                                                                                                                                          |
|                                                 |                                                   | Total MVPA Rho=0.46<br>MVBA Bouts Rho=0.57<br>(40)                                                                          | Total MVPA: 48%<br>BoutsMVPA: 83%<br>(40)                                                        | Total MVPA: 88%<br>BoutsMVPA: 56%<br>(40)                                                        | Identifying meeting the guidelines<br>kappa=0.13 (95%CI: 0.12-0.14)<br>Classification of inactive participants<br>kappa=0.45 (95%CI: 0.43-0.47)<br>(40)  |
|                                                 |                                                   |                                                                                                                             | Identifying meeting the guidelines: 18.7%<br>Classification of inactive participants: 74.2% (42) | Identifying meeting the guidelines: 97.2%<br>Classification of inactive participants: 79.7% (42) | Identifying meeting the guidelines:<br>kappa=0.13 (95%CI: 0.12-0.14)<br>Classification of inactive participants<br>kappa=0.45 (95%CI: 0.43-0.47)<br>(42) |
|                                                 |                                                   | MVPAtotal Rho=0.22<br>MVPAbouts Rho=0.51                                                                                    | MVPAtotal= 63.1%<br>(95%CI: 50.2-74.7%)                                                          | MVPAtotal=52.0%<br>(95%CI: 31.3-72.2%)                                                           |                                                                                                                                                          |

|                                                 |                                                                      |                                                                                                                                                                        |                                                       |                                                       |  |
|-------------------------------------------------|----------------------------------------------------------------------|------------------------------------------------------------------------------------------------------------------------------------------------------------------------|-------------------------------------------------------|-------------------------------------------------------|--|
|                                                 |                                                                      | MVPAtotalchange Rho=0.36<br>MVPAboutschange Rho=0.40<br>(41)                                                                                                           | MVPAbouts=69.2%<br>(95%CI: 56.6-80.1%)<br>(41)        | MVPAbouts=48.0%<br>(95%CI: 21.2-68.7%)<br>(41)        |  |
|                                                 |                                                                      | Rho=0.33-0.55 (30)                                                                                                                                                     |                                                       |                                                       |  |
|                                                 |                                                                      | AUC-ROC: against question hours per week 0.82 (95%CI: 0.81-0.83); against IPAQ total 0.71 (95%CI: 0.7-0.72); against IPAQ LTPA 0.75 (95%CI: 0.74-0.76) (68)            |                                                       |                                                       |  |
|                                                 |                                                                      | Version for parents:<br>7-day PAR rP=0.51<br>Pedometer rP=0.81<br>(38)                                                                                                 |                                                       |                                                       |  |
|                                                 | Month version:<br>kappaw=0.76 (95%CI 0.69-0.82)<br>Rho=0.82<br>(39)  | Month version:<br>Rho=0.33-0.48<br>(39)                                                                                                                                |                                                       |                                                       |  |
| Brief Physical Activity Assessment Tool (BPAAT) | Rho=0.61 (95%CI: 0.53-0.69)<br>kappa=0.58 (95%CI: 0.47-0.69)<br>(46) | AAQ Reference<br>Rho=0.54 (95%CI: 0.44-0.63)<br>kappa=46.7% (95%CI: 35.6%-57.9%)<br>Accelerometer<br>Rho=0.39 (95%CI: 0.28-0.49)<br>kappa=0.18 (95%CI: 0.39-0.33) (46) |                                                       |                                                       |  |
|                                                 | kappa=0.53 (95%CI: 0.33-0.72)<br>(43)                                | kappa =0.40 (95%CI: 0.12-0.69)<br>(43)                                                                                                                                 |                                                       |                                                       |  |
|                                                 |                                                                      | rho=0.394-0.435<br>(37)                                                                                                                                                | 50-52%<br>(37)                                        | 84-91%<br>(37)                                        |  |
|                                                 |                                                                      | Spanish version:<br>Against accelerometer:<br>MPA rP=0.22 (95%CI: 0.156-0.272)<br>VPA rP=0.28                                                                          | Spanish version:<br>0.75 (95%CI: 0.713-0.773)<br>(45) | Spanish version:<br>0.74 (95%CI: 0.702-0.790)<br>(45) |  |

|                                                          |                                                              |                                                                                                                                                                      |                     |                     |            |
|----------------------------------------------------------|--------------------------------------------------------------|----------------------------------------------------------------------------------------------------------------------------------------------------------------------|---------------------|---------------------|------------|
|                                                          |                                                              | (95%CI:0.165-0.391)<br>Agreement with 7DPAR Kappa=0.454<br>(95%CI: 0.405-0.505) AUC-ROC: 0.8<br>(95%CI: 0.78-0.83)<br>(45)                                           |                     |                     |            |
|                                                          | Spanish version:<br>kappa=0.70 (95%CI: 0.53-0.82)<br>(44)    | Spanish version:<br>kappa=0.64 (95%CI: 0.50-0.81)<br>(44)                                                                                                            |                     |                     |            |
|                                                          | Catalan version:<br>kappa=0.72 (95%CI: 0.55-0.83)<br>(44)    | Catalan version:<br>kappa=0.58 (95%CI: 0.43-0.77)<br>(44)                                                                                                            |                     |                     |            |
| Three-Question Assessment (3QA) (46)                     | Rho=0.63 (95%CI: 0.53-0.70)<br>kappa=0.56 (95%CI: 0.44-0.67) | AAQ Reference<br>Rho=0.43 (95%CI: 0.32-0.53)<br>kappa=38.7% (95%CI: 26.4%-51.1%)<br>Accelerometer<br>Rho=0.31 (95%CI: 0.18-0.43)<br>kappa=24.3% (95%CI: 11.6%-36.9%) |                     |                     |            |
| Amount of PA                                             |                                                              |                                                                                                                                                                      |                     |                     |            |
| Elaborative Exercise Questionnaire (47)                  |                                                              | rP=0.18 and lower                                                                                                                                                    |                     |                     |            |
| Self-report on Activity 2 (SR-2) (35)                    |                                                              | rho=0.21                                                                                                                                                             | 60% (Youden method) | 54% (Youden method) |            |
| JACC Questionnaire (60)                                  | kappaw=0.39 - 0.56                                           | Rho=0.43-0.60                                                                                                                                                        |                     |                     |            |
| Nordic Physical Activity Questionnaire (NPAQ-short) (58) | Open ended:<br>MVPA rho=0.82<br>VPA rho=0.80                 | MVPA rho=0.33<br>VPA rho=0.32                                                                                                                                        | 90%                 | 50%                 | kappa=0.42 |
|                                                          | Closed-ended:<br>MVPA kappa=0.66<br>VPA kappa=0.59           | MVPA kappa=0.17<br>VPA kappa=0.21                                                                                                                                    | 81%                 | 55%                 | kappa=0.34 |

|                                                                        |                                       |                                                                                                                                                                                         |                          |                          |  |
|------------------------------------------------------------------------|---------------------------------------|-----------------------------------------------------------------------------------------------------------------------------------------------------------------------------------------|--------------------------|--------------------------|--|
| Total Activity Measure (TAM) (36)                                      | TAM 1:<br>Rho=0.73 (95%CI: 0.56-0.83) | rP=0.257                                                                                                                                                                                |                          |                          |  |
|                                                                        | TAM 2:<br>Rho=0.82 (95%CI: 0.71-0.88) | rP=0.36-0.38                                                                                                                                                                            |                          |                          |  |
| Cohort of Norway (CONOR) Instrument (49)                               |                                       | For objective measures (VO2max, BMI, Triglycerides, HDL-Cholesterol, Waist to hip ratio) Rho=-0.14-0.13. Statistically significant increase of MET values IPAQ-L in more active groups. |                          |                          |  |
| General exercise participation/physical activity involvement questions |                                       |                                                                                                                                                                                         |                          |                          |  |
| Self-report on Activity 1 (SR-1) (35)                                  |                                       | rho=0.24                                                                                                                                                                                | 30%                      | 92%                      |  |
| Single-item screening question to identify physical inactivity (63)    |                                       | kappa=0.46-0.56                                                                                                                                                                         | 76.7% (95%CI: 73.5-79.7) | 81.1% (95%CI: 77.2-84.4) |  |
| St. Louis Working Hearts Program single exercise question (28)         |                                       | Exercisers had statistically significant lower BMI, greater oxygen capacity in both genders, and woman had a higher HDL cholesterol.                                                    |                          |                          |  |
| Self-reported level of PA compared with peers                          |                                       |                                                                                                                                                                                         |                          |                          |  |
| Compared to Peers Question (66)                                        |                                       | Rho=0.28<br>Rho=0.29 (with elaboration question)                                                                                                                                        |                          |                          |  |

|                                                                                                        |                                            |                                                                                                                                                            |  |  |  |
|--------------------------------------------------------------------------------------------------------|--------------------------------------------|------------------------------------------------------------------------------------------------------------------------------------------------------------|--|--|--|
| Relative PA Question (29)                                                                              | kappaw=0.56 (95%CI: 0.30-0.82)             | Rho from 0.28 (95%CI: 0.15-0.44) to 0.57 (95%CI: 0.38-0.78)                                                                                                |  |  |  |
| Categorical descriptions of PA levels                                                                  |                                            |                                                                                                                                                            |  |  |  |
| The Seven-level Single-Question Scale for Self-Reported Leisure Time Physical Activity (SR-PA L7) (59) | Rho=0.707<br>Three categories<br>Rho=0.622 | light PA Rho=0.105,<br>MVPA Rho=0.318,<br>total counts Rho=0.333<br><br>Three categories<br>light PA Rho=0.109<br>MVPA Rho=0.337<br>total counts Rho=0.333 |  |  |  |
| Self-report scale to assess habitual physical activity (31)                                            |                                            | step count Rho=0.49<br>moderate PA Rho=0.49<br>Low-Intensity PA Rho=0.40                                                                                   |  |  |  |

|                            |                                         |                                                                                                                                                                                                                                                                                                                                                                                                                                                                                                                                         |  |  |  |
|----------------------------|-----------------------------------------|-----------------------------------------------------------------------------------------------------------------------------------------------------------------------------------------------------------------------------------------------------------------------------------------------------------------------------------------------------------------------------------------------------------------------------------------------------------------------------------------------------------------------------------------|--|--|--|
| PA categories (61)         |                                         | <p>PA5:<br/>Partial correlations with controlling for age and gender with TT <math>r=0.57</math>; with MHPW, <math>r=0.44</math>. Participants who according to questionnaire met the recommended PA levels had a lower percentage of body fat and cholesterol.</p> <p>PA8:<br/>Partial correlations with controlling for age and gender with TT <math>r=0.53</math>; with MHPW, <math>r=0.43</math>. Participants who according to questionnaire met the recommended PA levels had a lower percentage of body fat and cholesterol.</p> |  |  |  |
| Absolute PA Question (29)  | $\kappa_{PA} = 0.75$ (95%CI: 0.60-0.91) | Rho from 0.10 (95%CI: 0.00-0.26) to 0.33 (95%CI: 0.19-0.49)                                                                                                                                                                                                                                                                                                                                                                                                                                                                             |  |  |  |
| Job Related Activity (66)  |                                         | Rho=-0.02                                                                                                                                                                                                                                                                                                                                                                                                                                                                                                                               |  |  |  |
| Main Daily Activity (66)   |                                         | Rho=0.22                                                                                                                                                                                                                                                                                                                                                                                                                                                                                                                                |  |  |  |
| Godin and coworkers simple |                                         | $r_P = 0.4$ and lower                                                                                                                                                                                                                                                                                                                                                                                                                                                                                                                   |  |  |  |

|                                                               |                                                                                        |                                                                                                                                                                                                                                                                                                                                             |                                       |                                       |                              |
|---------------------------------------------------------------|----------------------------------------------------------------------------------------|---------------------------------------------------------------------------------------------------------------------------------------------------------------------------------------------------------------------------------------------------------------------------------------------------------------------------------------------|---------------------------------------|---------------------------------------|------------------------------|
| self-administered instrument (GCSSI) (47)                     |                                                                                        |                                                                                                                                                                                                                                                                                                                                             |                                       |                                       |                              |
| Usual PA Scale (48)                                           | Rho=0.88 Internal consistency reliability (Correction for attenuation method Rho=0.68) | Against the PA questionnaire Rho=0.66.                                                                                                                                                                                                                                                                                                      |                                       |                                       |                              |
| The Stanford Leisure-Time Activity Categorical Item (L-CAT)   |                                                                                        | Against Steps Rho=0.38-0.41, weekly minutes MVPA Rho=0.38-0.40, Weekly minutes of MVPA bouts Rho=0.38-0.4 (33)                                                                                                                                                                                                                              | baseline: 30.4%<br>6mo: 54.2%<br>(33) | baseline: 88.7%<br>6mo: 74.5%<br>(33) |                              |
|                                                               | Rho=0.80, Kappaw=0.64 (95%CI: 0.54-0.73) (32)                                          | Linear regression for BMI: An increase in L-Cat category was associated with a lower BMI at baseline of ~0.5 BMI unit. (B= -0.4 (95%CI: -0.8 to -0.1; B= -0.14; P=0.02). Linear regression for Pedometer steps at 6 months: An increase in one L-Cat category was associated with 1059 more steps (95%CI: 712-1407; B= 0.38; P<0.001). (32) |                                       |                                       |                              |
| Work Leisure Physical Activity Questionnaire (WLPAQ) (34)     |                                                                                        | Bland-Altman plot showed small difference between EE measured by questionnaire and with DLW. Highest r value with the mean values=0.89.                                                                                                                                                                                                     |                                       |                                       |                              |
| Speedy Nutrition and Physical Activity Assessment (SNAP) (56) |                                                                                        | Total weekly min MVPA Bout PA Rho=0.32<br>Non-Bout Rho=0.41<br>No. of days >30min MVPA Bout Rho=0.31<br>Non-bout Rho=0.49                                                                                                                                                                                                                   |                                       |                                       | kappa=0.12(95%CI: 0.04-0.28) |

|                                                                                                          |  |                                                                                                                                                                                                        |  |  |  |
|----------------------------------------------------------------------------------------------------------|--|--------------------------------------------------------------------------------------------------------------------------------------------------------------------------------------------------------|--|--|--|
| Stanford Brief Activity Survey (SBAS) (64)                                                               |  | Higher active categories in SBAS have statistically significant higher minutes per week and EE per day (Stanford Seven-day Physical activity recall) and lower cardiovascular disease risk biomarkers. |  |  |  |
| The six-point scale (65)                                                                                 |  | IPAQ kappa=0.46 (95%CI: 0.26-0.66)<br>HAP kappa=0.57 (95%CI: 0.41-0.73)<br>IPAQ Rho=0.49<br>HAP Rho=0.69                                                                                               |  |  |  |
| Occupational Physical Activity Question from the Behavioral Risk Factor Surveillance System (BRFSS) (67) |  | kappa=0.56(95%CI: 0.54-0.58)                                                                                                                                                                           |  |  |  |
| Eurobarometer Survey Question (62)                                                                       |  | AUC-ROC: 0.751 (95%CI: 0.743-0.759) to 0.947 (95%CI: 0.945-0.95) (higher for higher PA level)                                                                                                          |  |  |  |
| Gothenburg Instrument (49)                                                                               |  | For objective measures (VO2max, BMI, Triglycerides, HDL-Cholesterol, Waist to hip ratio) Rho=-0.19-0.16. Statistically significant increase of MET values IPAQ-L in more active groups.                |  |  |  |

PA=physical activity, NM=not measured, MVPA=moderate to vigorous physical activity, CI=confidence interval, AUC-ROC=Area under the receiver operating characteristic curve, PAR=physical activity recall, BPAAT=brief physical activity assessment tool, AAQ=active Australia questionnaire, PAVS=physical activity and vital signs, SIPAM=single-item physical activity questionnaire, MPA=moderate physical activity, VPA=vigorous physical activity, 7DPAR=7-day physical activity recall, TAM=total activity measure, BMI=body mass index, IPAQ-L=International physical activity questionnaire long form, HDL=high density lipoprotein, MET=metabolic equivalent, CONOR=Cohort of Norway, SR-1=Self-report on activity 1, SR-PA L7=the Seven-level Single-Question Scale for Self-Reported Leisure Time Physical Activity, PA-5= single-response from five descriptors, PA-8= single-response from eight descriptors, MHPW=MET hours of reported PA per Week, TT=treadmill test, GCSSI=Godin and coworkers simple self-administered instrument, L-



CAT=the Stanford Leisure-Time Activity Categorical Item, WLPAQ=Work Leisure Physical Activity Questionnaire, DLW=doubly-labeled water, EE=energy expenditure, IPAQ=International Physical activity questionnaire, HAP=human activity profile, BRFSS=Behavioral Risk Factor Surveillance System

**Table 3. Length and readability levels of short physical activity questionnaires.**

| Tool                                            | Text                                                                                                                                                                                                                                                                                                                                                                                      | Word Count | Flesch Reading Score* | Flesch-Kincaid Grade Level*                   | Self-administered Reading Time (seconds) | Interviewer Speaking Time (seconds) |
|-------------------------------------------------|-------------------------------------------------------------------------------------------------------------------------------------------------------------------------------------------------------------------------------------------------------------------------------------------------------------------------------------------------------------------------------------------|------------|-----------------------|-----------------------------------------------|------------------------------------------|-------------------------------------|
| Number days of sufficient amount of PA per week |                                                                                                                                                                                                                                                                                                                                                                                           |            |                       |                                               |                                          |                                     |
| Physical Activity and Vital Signs (PAVS)        | <p>1 How many days in the past week have you performed PA where your heart beats faster and your breathing is harder than normal for 30 minutes or more? (in 3 times 10 minute bouts, or 1 time 30 minutes bout)<br/> <i>0 1 2 3 4 5 6 7 (circle one)</i></p> <p>2 How many days in a typical week have you performed activity such as this?<br/> <i>0 1 2 3 4 5 6 7 (circle one)</i></p> | 76         | 80,22                 | 6th grade (easy to read)                      | 19                                       | 24                                  |
| Single-Item Physical Activity Measure (SIPAM)   | In the past week, on how many days have you done a total of 30 minutes or more of physical activity, which was enough to raise your breathing rate? This may include sport, exercise, and brisk walking or cycling for recreation or to get to and from places, but should not include housework or physical activity that may be part of your job.                                       | 63         | 55,35                 | 10th to 12th grade (fairly difficult to read) | 16                                       | 21                                  |
|                                                 | Month variation: In the past month, on how many days have you done a total of 30 minutes or more of physical activity, which was enough to raise your breathing rate? This may include sport, exercise, and brisk walking or cycling for recreation or to get to and from places, but should not include housework or physical activity that may be part of your job.                     | 63         | 55,35                 | 10th to 12th grade (fairly difficult to read) | 16                                       | 21                                  |

|                                                 |                                                                                                                                                                                                                                                                                                                                                                                                                                                                                                                                                                                                                                                                                                                                    |     |       |                                               |    |    |
|-------------------------------------------------|------------------------------------------------------------------------------------------------------------------------------------------------------------------------------------------------------------------------------------------------------------------------------------------------------------------------------------------------------------------------------------------------------------------------------------------------------------------------------------------------------------------------------------------------------------------------------------------------------------------------------------------------------------------------------------------------------------------------------------|-----|-------|-----------------------------------------------|----|----|
|                                                 | Bauman variation: In the past week, on how many days have you done a total of 30 minutes or more of physical activity, which was enough to raise your breathing rate? This may include sport, traditional games, kapa haka, exercise and brisk walking or cycling for recreation or to get to and from places, but should not include housework or physical activity that may be part of your job.                                                                                                                                                                                                                                                                                                                                 | 67  | 49,09 | College (difficult to read)                   | 17 | 22 |
|                                                 | <i>Parents version:</i> On how many days in the course of the past week (past 7 days) have you engaged in at least 15-30 minutes of at least a moderate-intensity PA? (any activity that makes you breathe somewhat harder than normal, e.g., brisk walking, playing energetic games with children, sweeping, cleaning gutters, regular paced swimming or cycling, low-impact aerobics) to activities that make you breathe much harder than normal (e.g., heavy manual labour, moving heavy furniture, playing strenuous games with the children, high impact aerobics, running, fast bicycling) of which could be built up during the day with a variety of activities of at least 10 minutes in length, or done in one session. | 111 | 18,65 | College graduate (very difficult to read)     | 28 | 36 |
| Brief Physical Activity Assessment Tool (BPAAT) | 1 How many times a week do you usually do 20 minutes or more of vigorous-intensity physical activity that makes you sweat or puff and pant? (e.g., heavy lifting, digging, jogging, aerobics, or fast bicycling).<br><i>3 or more times a week.</i><br><i>1 to 2 times a week.</i><br><i>None.</i><br>2 How many times a week do you usually do 30 minutes or more of moderate-intensity physical activity or walking that increases your heart rate or makes you breathe harder than normal? (e.g., carrying light loads, bicycling at a regular pace, or playing doubles tennis).<br><i>5 or more times a week.</i><br><i>3–4 times a week.</i><br><i>1–2 times a week.</i><br><i>None.</i>                                      | 106 | 49,06 | College (difficult to read)                   | 27 | 35 |
| Three-Question Assessment (3QA)                 | 1 How many times a week do you usually do 20 minutes or more of vigorous-intensity physical activity that makes you sweat or puff and pant? (e.g., heavy lifting, digging, jogging, aerobics, or fast bicycling)?<br><i>3 or more times a week</i><br><i>1 to 2 times a week</i><br><i>none</i>                                                                                                                                                                                                                                                                                                                                                                                                                                    | 140 | 52,87 | 10th to 12th grade (fairly difficult to read) | 35 | 46 |

|                                    |                                                                                                                                                                                                                                                                                                                                                                                                                                                                                                                                                                                                                                                                                                                                                                                                                                                                                                                                                                                                                                                                                                          |     |       |                             |    |    |
|------------------------------------|----------------------------------------------------------------------------------------------------------------------------------------------------------------------------------------------------------------------------------------------------------------------------------------------------------------------------------------------------------------------------------------------------------------------------------------------------------------------------------------------------------------------------------------------------------------------------------------------------------------------------------------------------------------------------------------------------------------------------------------------------------------------------------------------------------------------------------------------------------------------------------------------------------------------------------------------------------------------------------------------------------------------------------------------------------------------------------------------------------|-----|-------|-----------------------------|----|----|
|                                    | <p>2 How many times a week do you usually do 30 minutes or more walking? (e.g., walking from place to place for exercise, leisure or recreation)</p> <p><i>5 or more times a week</i><br/> <i>3–4 times a week</i><br/> <i>1–2 times a week</i><br/> <i>none</i></p> <p>3 How many times a week do you usually do 30 minutes or more of moderate-intensity physical activity that increases your heart rate or makes you breathe harder than normal? (e.g., carrying light loads, bicycling at a regular pace, or doubles tennis)</p> <p><i>5 or more times a week</i><br/> <i>3–4 times a week</i><br/> <i>1–2 times a week</i><br/> <i>none</i></p>                                                                                                                                                                                                                                                                                                                                                                                                                                                    |     |       |                             |    |    |
| Amount of PA                       |                                                                                                                                                                                                                                                                                                                                                                                                                                                                                                                                                                                                                                                                                                                                                                                                                                                                                                                                                                                                                                                                                                          |     |       |                             |    |    |
| Elaborative Exercise Questionnaire | <p>Considering a 7-day period (a week), how many times on average do you do the following kinds of exercise for more than 15 minutes during your free time (write in each circle the appropriate number).</p> <p>Strenuous Exercise (heart beats rapidly): Running, jogging, hockey, football, soccer, squash, basketball, cross-country skiing, judo, roller skating, vigorous swimming, vigorous long-distance bicycling.<br/> Mark the average number of times that you perform one or more of the above activities during your typical week.</p> <p>Moderate Exercise (not exhausting): Fast walking, baseball, tennis, easy bicycling, volleyball, badminton, easy swimming, alpine skiing, popular and folk dancing.<br/> Mark the average number of times that you perform one or more of these activities during your typical week.</p> <p>Mild Exercise (minimal effort): Yoga, archery, fishing from a river bank, bowling, horseshoes, golf, snowmobiling, easy walking.<br/> Mark the average number of times that you perform one or more of these activities during your typical week.</p> | 152 | 34,80 | College (difficult to read) | 38 | 50 |

|                                                                     |                                                                                                                                                                                                                                                                                                                                                                                                                                                                                                                                                                                                      |     |       |                                 |    |    |
|---------------------------------------------------------------------|------------------------------------------------------------------------------------------------------------------------------------------------------------------------------------------------------------------------------------------------------------------------------------------------------------------------------------------------------------------------------------------------------------------------------------------------------------------------------------------------------------------------------------------------------------------------------------------------------|-----|-------|---------------------------------|----|----|
| Self-Report on Activity 2 (SR-2)                                    | Over the past week (even if it's not a typical week), how much time did you exercise or were you physically active (e.g. strength training, walking, swimming, gardening or other type of training)?<br><i>No time.</i><br><i>Less than 30 minutes per week.</i><br><i>30-60 minutes per week.</i><br><i>1-3 hours per week.</i><br><i>More than 3 hours per week.</i>                                                                                                                                                                                                                               | 55  | 45,16 | College (difficult to read)     | 14 | 18 |
| Japan Collaborative Cohort (JACC) Questionnaire                     | How much time per week on average do you spend engaging in sports or physical exercise?<br><i>1) At least 5 hours.</i><br><i>2) 3-4 hours.</i><br><i>3) 1-2 hours.</i><br><i>4) Little.</i><br>How much time per day on average do you spend walking indoors or outside?<br><i>1) More than 1 hour.</i><br><i>2) 30 minutes - 1 hour.</i><br><i>3) about 30 minutes.</i><br><i>4) Little.</i><br>How often did you engage in sports or physical exercise over the past year or two?<br><i>1) Seldom.</i><br><i>2) Sometimes.</i><br><i>3) About once a week.</i><br><i>4) At least twice a week.</i> | 90  | 69,89 | 8th & 9th grade (plain English) | 23 | 30 |
| Nordic Physical Activity Questionnaire – Short Version (NPAQ-short) | <i>Close ended:</i><br>Physical activities in your free time.<br>The following questions concern how physically active you are in your free time and during transport (including your commute to and from work/school/classes).<br>On a typical week, how much time do you spend in total on moderate and vigorous physical activities where your heartbeat increases and you breathe faster (e.g. brisk walking, cycling as a means of transport or as exercise, heavy gardening, running or recreational sports).<br>Only include activities that lasted at least 10 minutes at a time.            | 237 | 47,74 | College (difficult to read)     | 60 | 78 |

|  |                                                                                                                                                                                                                                                                                                                                                                                                                                                                                                                                                                                                                                                                                                                                                                                                                                                                                                                                                                                                                                                                                                                                                                                                      |     |       |                             |    |    |
|--|------------------------------------------------------------------------------------------------------------------------------------------------------------------------------------------------------------------------------------------------------------------------------------------------------------------------------------------------------------------------------------------------------------------------------------------------------------------------------------------------------------------------------------------------------------------------------------------------------------------------------------------------------------------------------------------------------------------------------------------------------------------------------------------------------------------------------------------------------------------------------------------------------------------------------------------------------------------------------------------------------------------------------------------------------------------------------------------------------------------------------------------------------------------------------------------------------|-----|-------|-----------------------------|----|----|
|  | <p><i>Less than ½ an hour (less than 30 minutes).</i><br/> <i>½ an hour – 1 ½ hours (30-90 minutes).</i><br/> <i>1 ½ - 2 ½ hours (90-150 minutes).</i><br/> <i>2 ½ - 5 hours (150-300 minutes).</i><br/> <i>More than 5 hours (150-300 minutes).</i></p> <p>How much of the time that you spend on physical activities in a typical week, which you indicated above, do you spend in total on vigorous physical activities? This includes activities that get your heart racing, make you sweat and leave you so short of breath that speaking becomes difficult (e.g. swimming, running, cycling at high speeds, cardio training, weight-lifting or team sports such as football).<br/> Only include activities that lasted at least 10 minutes at a time.<br/> <i>Less than ½ an hour (less than 30 minutes).</i><br/> <i>½ an hour – 1 hours (30-60 minutes).</i><br/> <i>1 - 1 ½ hours (60-90 minutes).</i><br/> <i>1 ½ - 2 ½ hours (90-150 minutes).</i><br/> <i>More than 2 ½ hours (more than 150 minutes).</i></p>                                                                                                                                                                           |     |       |                             |    |    |
|  | <p><i>Open ended:</i><br/> Physical activities in your free time.<br/> The following questions concern how physically active you are in your free time and during transport (including your commute to and from work/school/classes).<br/> On a typical week, how much time do you spend in total on moderate and vigorous physical activities where your heartbeat increases and you breathe faster (e.g. brisk walking, cycling as a means of transport or as exercise, heavy gardening, running or recreational sports).<br/> Only include activities that lasted at least 10 minutes at a time.<br/> <i>Hours pr week. Minutes pr week.</i><br/> How much of the time that you spend on physical activities in a typical week, which you indicated above, do you spend in total on vigorous physical activities? This includes activities that get your heart racing, make you sweat and leave you so short of breath that speaking becomes difficult (e.g. swimming, running, cycling at high speeds, cardio training, weight-lifting or team sports such as football).<br/> Only include activities that lasted at least 10 minutes at a time.<br/> <i>Hours pr week. Minutes pr week.</i></p> | 175 | 47,74 | College (difficult to read) | 44 | 57 |

|                                        |                                                                                                                                                                                                                                                                                                                                                                                                                                                                                                                                                                                                                                                                                                                                                                                                                                                                                                                                                                                                                                                                                                                                                                                                                                                                                                                                                                                                                                                                                                                                                                                                                                                                        |     |       |                                               |    |    |
|----------------------------------------|------------------------------------------------------------------------------------------------------------------------------------------------------------------------------------------------------------------------------------------------------------------------------------------------------------------------------------------------------------------------------------------------------------------------------------------------------------------------------------------------------------------------------------------------------------------------------------------------------------------------------------------------------------------------------------------------------------------------------------------------------------------------------------------------------------------------------------------------------------------------------------------------------------------------------------------------------------------------------------------------------------------------------------------------------------------------------------------------------------------------------------------------------------------------------------------------------------------------------------------------------------------------------------------------------------------------------------------------------------------------------------------------------------------------------------------------------------------------------------------------------------------------------------------------------------------------------------------------------------------------------------------------------------------------|-----|-------|-----------------------------------------------|----|----|
| <p>Total Activity Measure 1 (TAM1)</p> | <p>We'd like to know how active you are.</p> <p>1 In an average week how many times do you do 'Strenuous' activities? Strenuous activity means any activity that take as much effort as – jogging or running, digging in heavy ground, aerobics classes, vigorous swimming, heavy DIY jobs like sawing thick or long pieces of wood, football, circuit training, squash...<br/><i>'Strenuous activity' times a week.</i></p> <p>1b If you do a 'strenuous' activity, how many minutes do you do it for on average?<br/><i>'Strenuous activity' minutes each time.</i></p> <p>2 In an average week how many times do you do 'moderate' activities? Moderate activity means any activity that take as much effort as – brisk walking, housework, carrying a light shopping bag on level ground, mowing the lawn, general DIY like painting and decorating, easy swimming, easy cycling, ballroom dancing...<br/><i>'Moderate activity' times a week.</i></p> <p>2b If you do a moderate activity, how many minutes do you do it for on average?<br/><i>'Moderate activity' minutes each time.</i></p> <p>3 In an average week how many times do you do any mild activities? Mild activity means any activity that take as much effort as – easy walking, very light housework, browsing in shops, slow dancing, bowls, river fishing, golf, hand weeding in the garden...<br/><i>'Mild activity' times a week.</i></p> <p>3b If you do a 'mild' activity, how many minutes do you do it for on average?<br/><i>'Mild activity' minutes each time.</i></p> <p>Please check that you have put a number in all 6 boxes, even if it is a 0.<br/>Thank you for your help.</p> | 259 | 56,69 | 10th to 12th grade (fairly difficult to read) | 63 | 82 |
| <p>TAM 2</p>                           | <p>We'd like to know how active you are.</p> <p>1 In an average week how many times do you do 'Strenuous' activities? Strenuous activity means any activity that take as much effort as – jogging or running, digging in heavy ground, aerobics classes, vigorous swimming, heavy DIY jobs like sawing thick or long pieces of wood, football, circuit training, squash...<br/><i>'Strenuous activity' times a week.</i></p>                                                                                                                                                                                                                                                                                                                                                                                                                                                                                                                                                                                                                                                                                                                                                                                                                                                                                                                                                                                                                                                                                                                                                                                                                                           | 244 | 55,31 | 10th to 12th grade (fairly difficult to read) | 59 | 77 |

|                                                |                                                                                                                                                                                                                                                                                                                                                                                                                                                                                                                                                                                                                                                                                                                                                                                                                                                                                                                                                                                                                                                                                                                                                                       |     |       |                                 |    |    |
|------------------------------------------------|-----------------------------------------------------------------------------------------------------------------------------------------------------------------------------------------------------------------------------------------------------------------------------------------------------------------------------------------------------------------------------------------------------------------------------------------------------------------------------------------------------------------------------------------------------------------------------------------------------------------------------------------------------------------------------------------------------------------------------------------------------------------------------------------------------------------------------------------------------------------------------------------------------------------------------------------------------------------------------------------------------------------------------------------------------------------------------------------------------------------------------------------------------------------------|-----|-------|---------------------------------|----|----|
|                                                | <p>1b For how many minutes in total do you do strenuous activities?<br/><i>'Strenuous activity' total minutes.</i></p> <p>2 In an average week how many times do you do 'moderate' activities?<br/>Moderate activity means any activity that take as much effort as – brisk walking, housework, carrying a light shopping bag on level ground, mowing the lawn, general DIY like painting and decorating, easy swimming, easy cycling, ballroom dancing...<br/><i>'Moderate activity' times a week.</i></p> <p>2b For how many minutes in total in an average week do you 'mild' activities?</p> <p>3 In an average week, how many times do you do any mild activities?<br/>Mild activity means any activity that take as much effort as – easy walking, very light housework, browsing in shops, slow dancing, bowls, river fishing, golf, hand weeding in the garden...<br/><i>'Mild activity' times a week.</i></p> <p>3b For how many minutes in total in an average week do you do mild activities?<br/><i>'Mild activity' total minutes.</i></p> <p>Please check that you have put a number in all 6 boxes, even if it is a 0.<br/>Thank you for your help.</p> |     |       |                                 |    |    |
| <p>Cohort of Norway (CONOR)<br/>Instrument</p> | <p>How has your physical activity during leisure time been over the last year? Think of your weekly average for the year. Time spent going to or from work counts as leisure time.<br/>Hours per week: None/Less than 1/1-2/3 or more.<br/>Light activity (not sweating or out of breath).<br/>Hard physical activity (sweating/out of breath).</p> <p>Please note physical activity during the past year in your spare time. What does describe you better?<br/>If activity varies between summer and wintertime, note a mean value. (Tick one only)<br/>Reading, watching TV or any other sedentary activity?<br/>Walking, cycling, or other activity, other for at least 4 hours a week? (Count also walking back and forth from work)<br/>Light sports, heavy gardening? (At least 4 hours per week).</p>                                                                                                                                                                                                                                                                                                                                                         | 132 | 67,44 | 8th & 9th grade (Plain English) | 33 | 43 |

|                                                                        |                                                                                                                                                                                                                 |    |       |                                 |      |       |
|------------------------------------------------------------------------|-----------------------------------------------------------------------------------------------------------------------------------------------------------------------------------------------------------------|----|-------|---------------------------------|------|-------|
|                                                                        | Hard exercise, competitive sports? Regularly and several times a week.                                                                                                                                          |    |       |                                 |      |       |
| General exercise participation/physical activity involvement questions |                                                                                                                                                                                                                 |    |       |                                 |      |       |
| Self-Report on Activity 1 (SR-1)                                       | I exercise regularly.<br>1 2 3 4 5                                                                                                                                                                              | 8  | N/A   | N/A                             | 2    | 3     |
| Single-item screening question to identify physical inactivity         | As a rule, do you do at least half an hour of moderate or vigorous exercise (such as walking or a sport) on five or more days of the week?<br>Yes.<br>No.                                                       | 32 | 72,05 | 7th grade (fairly easy to read) | 8    | 10    |
| St. Louis Working Hearts Program single exercise question              | Do you currently participate in any regular activity or program (either on your own or in a formal class) designed to improve or maintain your physical fitness?<br>Yes.<br>No.                                 | 29 | 32,16 | College (difficult to read)     | 6    | 8     |
| Self-reported level of PA compared with peers                          |                                                                                                                                                                                                                 |    |       |                                 |      |       |
| Compared to Peers Question                                             | Would you say that you are physically more active, less active, or about as active as other persons your age?<br><i>Elaboration:</i><br>Is that a lot more or a little more/a lot less or a little less active? | 36 | 73,42 | 7th grade (fairly easy to read) | 9,08 | 11,80 |
| Relative PA Question                                                   | Compared to other people your own age, do you think you are...<br>- <i>Much more active</i><br>- <i>More active</i><br>- <i>About as active</i><br>- <i>Less active</i><br>- <i>Much less active</i>            | 25 | 88,91 | 6th grade (easy to read)        | 6,30 | 8,20  |



Categorical descriptions of PA levels

|                                                                                                          |                                                                                                                                                                                                                                                                                                                                                                                                                                                                                                                                                                                                                                                                                                                                                                                                                                                                                                                                                                                                                                                                                                   |            |              |                                                      |           |           |
|----------------------------------------------------------------------------------------------------------|---------------------------------------------------------------------------------------------------------------------------------------------------------------------------------------------------------------------------------------------------------------------------------------------------------------------------------------------------------------------------------------------------------------------------------------------------------------------------------------------------------------------------------------------------------------------------------------------------------------------------------------------------------------------------------------------------------------------------------------------------------------------------------------------------------------------------------------------------------------------------------------------------------------------------------------------------------------------------------------------------------------------------------------------------------------------------------------------------|------------|--------------|------------------------------------------------------|-----------|-----------|
| <p>The Seven-level Single-Question Scale for Self-Reported Leisure Time Physical Activity (SR-PA L7)</p> | <p>Which of the following descriptions best corresponds to your physical activity at the moment?</p> <p>I do not move more than is necessary in my daily routines/chores.</p> <p>I go for casual walks and engage in light outdoor recreation 1-2 times a week.</p> <p>I go for casual walks and engage in light outdoor recreation several times a week.</p> <p>I engage, 1-2 times a week, in brisk physical activity (e.g. yard work, walking, and cycling) to the point of perspiring and some degree of breathlessness.</p> <p>Several times a week (3-5), I engage in brisk physical activity (e.g. yard work, walking, and cycling) to the point of perspiring and some degree of breathlessness.</p> <p>I do keep-fit exercises several times a week in a way that causes rather strong shortness of breath and sweating during the activity.</p> <p>I participate in competitive sports and maintain my fitness through regular training.</p>                                                                                                                                            | <p>144</p> | <p>54,03</p> | <p>10th to 12th grade (fairly difficult to read)</p> | <p>36</p> | <p>47</p> |
| <p>Self-report scale to assess habitual physical activity</p>                                            | <p>If you think about the past 6 months, which of the following descriptions best pictures your physical activity?</p> <p>Mostly resting, hardly any activity.</p> <p>Mostly sitting. You are usually doing things in a seated position, reading and watching TV. Your only physical activities relate to activities of daily living (grooming, dressing).</p> <p>Light physical activity. You are doing light housework (e.g., preparing food, dusting) or light gardening or going for a walk two to three times a week.</p> <p>Moderate physical activity about 3 hours a week. You are doing common housework (e.g., vacuum cleaning/sweeping floors, lawnmowing) or going for longer walks (at least 2 km) or cycling.</p> <p>Moderate physical activity at least 4 hours a week or heavier physical activity up to 4 hours a week (daily more than 30 minutes). You are doing moderate physical activities (see before) for at least 4 hours or physically exercise 1–2 hours a week or doing heavy gardening/housework or home maintenance involving some breathlessness and sweating.</p> | <p>203</p> | <p>51,79</p> | <p>10th to 12th grade (fairly difficult to read)</p> | <p>51</p> | <p>67</p> |

|                      |                                                                                                                                                                                                                                                                                                                                                                                                                                                                                                                                                                                                                                                                                                                                                                                                                                                                                                                                                                                                                 |     |       |                                               |    |    |
|----------------------|-----------------------------------------------------------------------------------------------------------------------------------------------------------------------------------------------------------------------------------------------------------------------------------------------------------------------------------------------------------------------------------------------------------------------------------------------------------------------------------------------------------------------------------------------------------------------------------------------------------------------------------------------------------------------------------------------------------------------------------------------------------------------------------------------------------------------------------------------------------------------------------------------------------------------------------------------------------------------------------------------------------------|-----|-------|-----------------------------------------------|----|----|
|                      | <p>You are engaging in active sports several times a week, which makes you heavily sweat and breathless during the exercise or you are doing heavy gardening or leisure time activities (at least 3 hours a week).</p> <p>You are participating in competitive sports.</p>                                                                                                                                                                                                                                                                                                                                                                                                                                                                                                                                                                                                                                                                                                                                      |     |       |                                               |    |    |
| PA categories        | <p>Single response from eight descriptors (PA8):</p> <p>1 I do not exercise/walk regularly now and I do not intend to start in the near future.</p> <p>2 I do not exercise/walk regularly but I have been thinking of starting.</p> <p>3 I am trying to start to exercise or walk or I exercise/walk infrequently.</p> <p>4 I am doing vigorous physical activity less than three times per week or moderate physical activity less than five times per week.</p> <p>5 I have been doing moderate physical activity that accumulates to at least 30 minutes per day at least 5 days per week for 1-6 months.</p> <p>6 I have been doing moderate physical activity that accumulates to at least 30 minutes per day at least 5 days per week for 7 or more months.</p> <p>7 I have been doing vigorous physical activity at least 20 minutes a day 3-5 days per week for 1-6 months.</p> <p>8 I have been doing vigorous physical activity at least 20 minutes a day 3-5 days per week for 7 or more months.</p> | 166 | 70,09 | 7th grade (fairly easy to read)               | 40 | 52 |
|                      | <p>Single response from five descriptors (PA5):</p> <p>1 I don't exercise or walk regularly now and I don't plan to start in the near future.</p> <p>2 I don't exercise or walk regularly now but I've been thinking about starting.</p> <p>3 I'm doing moderate physical activity fewer than five times a week or vigorous activity fewer than three times a week.</p> <p>4 I've been doing moderate physical activity 5 or more days a week, or vigorous activity at least 3 days a week, for the last 1 to 6 months.</p> <p>5 I've been doing moderate physical activity 5 or more days a week or vigorous activity at least 3 days a week, for 7 months or longer.</p>                                                                                                                                                                                                                                                                                                                                      | 109 | 68,29 | 8th & 9th grade (plain English)               | 27 | 36 |
| Absolute PA Question | <p>What best describes your activity level?</p> <p>Vigorously active for at least 30 minutes, 3 times per week.</p> <p>Moderately active for at least 3 times per week.</p> <p>Seldom active, preferring sedentary activities.</p>                                                                                                                                                                                                                                                                                                                                                                                                                                                                                                                                                                                                                                                                                                                                                                              | 34  | 57,06 | 10th to 12th grade (fairly difficult to read) | 9  | 11 |

|                                                                 |                                                                                                                                                                                                                                                                                                                                                                                                                                                                                                                                                                                                                                                                                                                                                                                                                                                                                                                                                                                                                                                                                                                                                                                                                                                                                                                                                    |     |       |                                               |    |     |
|-----------------------------------------------------------------|----------------------------------------------------------------------------------------------------------------------------------------------------------------------------------------------------------------------------------------------------------------------------------------------------------------------------------------------------------------------------------------------------------------------------------------------------------------------------------------------------------------------------------------------------------------------------------------------------------------------------------------------------------------------------------------------------------------------------------------------------------------------------------------------------------------------------------------------------------------------------------------------------------------------------------------------------------------------------------------------------------------------------------------------------------------------------------------------------------------------------------------------------------------------------------------------------------------------------------------------------------------------------------------------------------------------------------------------------|-----|-------|-----------------------------------------------|----|-----|
| Job Related Activity                                            | How much hard physical work is required on your job? Would you say a great deal, a moderate amount, a little or none?                                                                                                                                                                                                                                                                                                                                                                                                                                                                                                                                                                                                                                                                                                                                                                                                                                                                                                                                                                                                                                                                                                                                                                                                                              | 23  | 84,81 | 6th grade (easy to read)                      | 6  | 8   |
| Main Daily Activity                                             | How much hard physical work is required in your main daily activity? Would you say a great deal, a moderate amount, a little or none?                                                                                                                                                                                                                                                                                                                                                                                                                                                                                                                                                                                                                                                                                                                                                                                                                                                                                                                                                                                                                                                                                                                                                                                                              | 25  | 72,32 | 7th grade (fairly easy to read)               | 6  | 8   |
| Godin and coworkers simple self-administered instrument (GCSSI) | How often did you participate in one or more physical activities of 20 to 30 minutes duration per session during your leisure time within the past 6 months?<br>1 <i>Not at all.</i><br>2 <i>Less than once a month.</i><br>3 <i>About once a month.</i><br>4 <i>About two or three times a month.</i><br>5 <i>About one to two times a week.</i><br>6 <i>Three or more times a week.</i>                                                                                                                                                                                                                                                                                                                                                                                                                                                                                                                                                                                                                                                                                                                                                                                                                                                                                                                                                          | 66  | 54,54 | 10th to 12th grade (fairly difficult to read) | 17 | 22  |
| The Stanford Leisure-Time Activity Categorical Item (L-CAT)     | During the past month, which statement best describes the kinds of physical activity you usually performed during your FREE TIME (i.e., recreational or leisure time)?<br>1 I did not engage in much physical activity. I mostly did things like watching television, reading, playing cards, or playing computer games. Only occasionally, no more than once or twice a month, did I do anything more active such as getting outdoors for a walk or playing tennis.<br>2 Once or twice a week, I engaged in light activities such as getting outdoors on the weekends for a walk. Or I did some light chores around the house such as sweeping floors or vacuuming.<br>3 About three times a week, I did some moderate activity such as brisk walking, swimming, or riding a bike for about 15–20 minutes each time. Or about once a week, I did some moderately difficult chores such as raking, washing windows, or mowing the lawn for about 45–60 minutes. Or about once a week, I played sports such as doubles tennis or basketball for about 45–60 minutes.<br>4 Almost daily, that is five or more times a week, I did some moderate activity such as brisk walking, swimming, or riding a bike for 30 minutes or more each time. Or about once a week, I did some moderately difficult chores or played team sports for 2 hours or more. | 331 | 62,20 | 8th & 9th grade (plain English)               | 83 | 109 |

|  |                                                                                                                                                                                                                                                                                                                                                                                                                                                                                                                                                                                                                                                                                                                                                                                                                                                                                                                                                                                                                                                                                                                                                                                                                                                                                                                                                                                                                                                                                                                                                                                                                                                                                                             |     |       |                                 |    |    |
|--|-------------------------------------------------------------------------------------------------------------------------------------------------------------------------------------------------------------------------------------------------------------------------------------------------------------------------------------------------------------------------------------------------------------------------------------------------------------------------------------------------------------------------------------------------------------------------------------------------------------------------------------------------------------------------------------------------------------------------------------------------------------------------------------------------------------------------------------------------------------------------------------------------------------------------------------------------------------------------------------------------------------------------------------------------------------------------------------------------------------------------------------------------------------------------------------------------------------------------------------------------------------------------------------------------------------------------------------------------------------------------------------------------------------------------------------------------------------------------------------------------------------------------------------------------------------------------------------------------------------------------------------------------------------------------------------------------------------|-----|-------|---------------------------------|----|----|
|  | <p>5 About three times a week, I engaged in a regular program of physical fitness involving some kind of heavy or vigorous physical activity such as running or riding hard on a bicycle for 30 minutes or more each time. Or I did chores such as heavy gardening or played active sports such as handball or singles tennis for 60 minutes or more each time.</p> <p>6 Almost daily, that is, five or more times a week, I engaged in a regular program of physical fitness involving some kind of heavy or vigorous physical activity for 30 minutes or more each time.</p>                                                                                                                                                                                                                                                                                                                                                                                                                                                                                                                                                                                                                                                                                                                                                                                                                                                                                                                                                                                                                                                                                                                              |     |       |                                 |    |    |
|  | <p><i>Version 2.2:</i> During the past month, which statement best describes the kinds of physical activity you usually did? Do not include the time you spent working at a job. Please read all six statements before selecting one.</p> <p>1 I did not do much physical activity. I mostly did things like watching television, reading, playing cards, or playing computer games. Only occasionally, no more than once or twice a month, did I do anything more active such as going for a walk or playing tennis.</p> <p>2 Once or twice a week, I did light activities such as getting outdoors on the weekends for an easy walk or stroll. Or once or twice a week, I did chores around the house such as sweeping floors or vacuuming.</p> <p>3 About three times a week, I did moderate activities such as brisk walking, swimming, or riding a bike for about 15–20 minutes each time. Or about once a week, I did moderately difficult chores such as raking or mowing the lawn for about 45–60 minutes. Or about once a week, I played sports such as softball, basketball, or soccer for about 45–60 minutes.</p> <p>4 Almost daily, that is five or more times a week, I did moderate activities such as brisk walking, swimming, or riding a bike for 30 minutes or more each time. Or about once a week, I did moderately difficult chores or played sports for 2 hours or more.</p> <p>5 About three times a week, I did vigorous activities such as running or riding hard on a bike for 30 minutes or more each time.</p> <p>6 Almost daily, that is, five or more times a week, I did vigorous activities such as running or riding hard on a bike for 30 minutes or more each time.</p> | 293 | 72,38 | 7th grade (fairly easy to read) | 74 | 96 |

|                                                      |                                                                                                                                                                                                                                                                                                                                                                                                                                                                                                                                                                                                                                                                                                                                                                                                                                                                                                                                                                                                                                                                                                |     |       |                                               |    |    |
|------------------------------------------------------|------------------------------------------------------------------------------------------------------------------------------------------------------------------------------------------------------------------------------------------------------------------------------------------------------------------------------------------------------------------------------------------------------------------------------------------------------------------------------------------------------------------------------------------------------------------------------------------------------------------------------------------------------------------------------------------------------------------------------------------------------------------------------------------------------------------------------------------------------------------------------------------------------------------------------------------------------------------------------------------------------------------------------------------------------------------------------------------------|-----|-------|-----------------------------------------------|----|----|
| Usual PA Scale                                       | <p>My job requires very hard physical labor (such as digging or loading heavy objects) at least four hours a day.<br/> Or I do vigorous activities (jogging, cycling, swimming, etc.) at least three times per week for 30-10 min. or more.<br/> Or I do at least one hour of moderate activity such as brisk walking at least four days a week.</p> <p>My job requires that I walk, lift, carry or do other moderately hard work for several hours per day (day care worker, stock clerk, or busboy/waitress).<br/> Or I spend much of my leisure time doing moderate activities (dancing, gardening, walking or housework).</p> <p>My job requires that I sit at a desk most of the day.<br/> And much of my leisure time is spent in sedentary activities (watching TV, reading, etc.).<br/> And I seldom work up a sweat and I cannot walk fast without having to stop to catch my breath.</p>                                                                                                                                                                                             | 150 | 69,36 | 8th & 9th grade<br>(plain English)            | 38 | 49 |
| Work Leisure Physical Activity Questionnaire (WLPAQ) | <p>Describe your physical activity at work (even work at home, sick leave at home and studying, for instance in a university).<br/> 1 Very light, e.g., sitting at the computer most of the day or sitting at a desk.<br/> 2 Light, e.g., light industrial work, sales or office work that comprises light activities.<br/> 3 Moderate, e.g., cleaning, staffing at kitchen or delivering mail on foot or by bicycle.<br/> 4 Heavy, e.g., heavy industrial work, construction work or farming.<br/> Describe your physical activity at leisure time. If the activities vary between summer and winter, try to give a mean estimate.<br/> 1 Very light: almost no activity at all.<br/> 2 Light, e.g., walking, nonstrenuous cycling or gardening approximately once a week.<br/> 3 Moderate: regular activity at least once a week, e.g., walking, bicycling, or gardening or walking to work 10–30 minutes per day.<br/> 4 Active: regular activities more than once a week, e.g., intense walking or bicycling or sports.<br/> 5 Very active: strenuous activities several times a week.</p> | 165 | 56,49 | 10th to 12th grade (fairly difficult to read) | 42 | 54 |

|                                                                 |                                                                                                                                                                                                                                                                                                                                                                                                                                                                                                                                                                                                                                                                                                                                                                                                                                                                                                                                                                                                                                                                                                                                                                                                                                                                                                                                                                                                                                                                                                                                                                       |            |              |                                            |            |            |
|-----------------------------------------------------------------|-----------------------------------------------------------------------------------------------------------------------------------------------------------------------------------------------------------------------------------------------------------------------------------------------------------------------------------------------------------------------------------------------------------------------------------------------------------------------------------------------------------------------------------------------------------------------------------------------------------------------------------------------------------------------------------------------------------------------------------------------------------------------------------------------------------------------------------------------------------------------------------------------------------------------------------------------------------------------------------------------------------------------------------------------------------------------------------------------------------------------------------------------------------------------------------------------------------------------------------------------------------------------------------------------------------------------------------------------------------------------------------------------------------------------------------------------------------------------------------------------------------------------------------------------------------------------|------------|--------------|--------------------------------------------|------------|------------|
| <p>Speedy Nutrition and Physical Activity Assessment (SNAP)</p> | <p>How Active are You?<br/> Examples of activity are<br/> Walking<br/> Housework<br/> Work in the yard or garden<br/> Dancing<br/> Jobs that require walking, lifting or other hard work<br/> Exercise</p> <p>Are you active for 30 minutes on 5 days of the week?<br/> 1 No and I have no plans to be more active.<br/> 2 No, but I have been thinking about being more active.<br/> 3 Sometimes I am active for 30 minutes but not all the time.<br/> 4 Yes, I am active for 30 minutes on 5 days of the week.</p>                                                                                                                                                                                                                                                                                                                                                                                                                                                                                                                                                                                                                                                                                                                                                                                                                                                                                                                                                                                                                                                  | <p>89</p>  | <p>88,12</p> | <p>6th grade (easy to read)</p>            | <p>22</p>  | <p>29</p>  |
| <p>Stanford Brief Activity Survey (SBAS)</p>                    | <p><i>Appendix Table 1</i><br/> A If you have no job or regular work, check box A and go on to Appendix table 2.<br/> B I spent most of the day sitting or standing. When I was at work, I did such things as writing, typing, talking on the telephone, assembling small parts, or operating a machine that takes very little exertion or strength. If I drove a car or truck while at work, I did not lift or carry anything for more that a few minutes each day.<br/> C I spent most of the day walking or using my hands and arms in work that required moderate exertion. When I was at work, I did such things as delivering mail, patrolling on guard duty, doing mechanical work on automobiles or other large machines, house painting, or operating a machine that requires some moderate-activity work of me. If I drove a truck or lift, my job required me to lift and carry things frequently.<br/> D I spent most of the day lifting or carrying heavy objects or moving most of my body in some other way. When I was at work, I did such things as stacking cargo or inventory, handling parts or materials, or doing work like that of a carpenter who builds structures or a gardener who does most of the work without machines.<br/> E I spent most of the day doing hard physical labor. When I was at work, I did such things as digging or chopping with heavy tools or carrying heavy loads (bricks, for example) to the place where they were to be used. If I drove a truck or operated equipment, my job also required me to do hard</p> | <p>600</p> | <p>60,80</p> | <p>8th &amp; 9th grade (plain English)</p> | <p>151</p> | <p>197</p> |

|                     |                                                                                                                                                                                                                                                                                                                                                                                                                                                                                                                                                                                                                                                                                                                                                                                                                                                                                                                                                                                                                                                                                                                                                                                                                                                                                                                                                                                                                                                                                                                                                                                                                                                                                                                                                                                                                                                                                                             |    |    |                                    |    |    |
|---------------------|-------------------------------------------------------------------------------------------------------------------------------------------------------------------------------------------------------------------------------------------------------------------------------------------------------------------------------------------------------------------------------------------------------------------------------------------------------------------------------------------------------------------------------------------------------------------------------------------------------------------------------------------------------------------------------------------------------------------------------------------------------------------------------------------------------------------------------------------------------------------------------------------------------------------------------------------------------------------------------------------------------------------------------------------------------------------------------------------------------------------------------------------------------------------------------------------------------------------------------------------------------------------------------------------------------------------------------------------------------------------------------------------------------------------------------------------------------------------------------------------------------------------------------------------------------------------------------------------------------------------------------------------------------------------------------------------------------------------------------------------------------------------------------------------------------------------------------------------------------------------------------------------------------------|----|----|------------------------------------|----|----|
|                     | <p>physical work most of the day with only short breaks.</p> <p><i>Appendix Table 2</i></p> <p>F Most of my leisure time was spent without very much physical activity. I mostly did things like watching television, reading, or playing cards. If I did anything else, it was likely to be light chores around the house or yard or some easy-going game like bowling or catch. Only occasionally, no more than once or twice a month, did I do anything more vigorous, like jogging, playing tennis, or active gardening.</p> <p>G Weekdays, when I got home from work, I did few active things, but most weekends I was able to get outdoors for some light exercise—going for walks, playing a round of golf (without motorized carts), or doing some active chores around the house.</p> <p>H Three times per week, on average, I engaged in some moderate activity, such as brisk walking or slow jogging, swimming, or riding a bike for 15–20 minutes or more, or I spent 45 minutes to an hour or more doing moderately difficult chores, such as raking or washing windows, mowing the lawn or vacuuming, or playing games such as doubles tennis or basketball.</p> <p>I During my leisure time over the past year, I engaged in a regular program of physical fitness involving some kind of heavy physical activity at least three times per week. Examples of heavy physical activity are jogging, running, or riding fast on a bicycle for 30 minutes or more; heavy gardening or other chores for an hour or more; active games or sports such as handball or tennis for an hour or more; or a regular program involving calisthenics and jogging or the equivalent for 30 minute or more.</p> <p>J Over the past year, I engaged in a regular program of physical fitness along the lines described in the last paragraph (I), but I did it almost daily—five or more times per week.</p> |    |    |                                    |    |    |
| The six-point scale | <p>1 Moving only for necessary chores.</p> <p>2 Walking or other outdoor activities one or two times per week.</p> <p>3 Walking or other outdoor activities several times per week.</p> <p>4 Exercising one or two times per week to the point of perspiring and heavy breathing.</p> <p>5 Exercising several times per week to the point of perspiring and heavy breathing.</p> <p>6 Keep-fit heavy exercise or competitive sport several times per week.</p>                                                                                                                                                                                                                                                                                                                                                                                                                                                                                                                                                                                                                                                                                                                                                                                                                                                                                                                                                                                                                                                                                                                                                                                                                                                                                                                                                                                                                                              | 69 | 64 | 8th & 9th grade<br>(plain English) | 17 | 23 |

|                                         |                                                                                                                                                                                                                                                                                                                                                                                                                                                                                                                                     |    |       |                                 |    |    |
|-----------------------------------------|-------------------------------------------------------------------------------------------------------------------------------------------------------------------------------------------------------------------------------------------------------------------------------------------------------------------------------------------------------------------------------------------------------------------------------------------------------------------------------------------------------------------------------------|----|-------|---------------------------------|----|----|
| Occupational Physical Activity Question | When you are at work, which of the following best describes what you do?<br><i>Mostly sitting or standing.</i><br><i>Mostly walking.</i><br><i>Mostly heavy labor or physically demanding work.</i><br><i>Do not work.</i><br><i>Don't know/not sure.</i><br><i>Refused.</i>                                                                                                                                                                                                                                                        | 35 | 89,90 | 6th grade (easy to read)        | 9  | 11 |
| Eurobarometer Survey Question           | How often do you exercise, play sport, or engage in other physical activity, such as cycling from one place to another, dancing, gardening, etc.?<br><i>Never.</i><br><i>Occasionally.</i><br><i>Few times a week.</i><br><i>Almost daily.</i>                                                                                                                                                                                                                                                                                      | 32 | 41,48 | College (difficult to read)     | 8  | 10 |
| Gothenburg Instrument                   | Please note physical activity during the past year in your spare time. What does describe you better.<br>If activity varies between summer and wintertime, note a mean value.<br>(Tick one only)<br>1 Reading, watching TV or any other sedentary activity?<br>2 Walking, cycling, or other activity, other for at least 4 hours a week? (Count also walking back and forth from work.)<br>3 Light sports, heavy gardening? (At least 4 hours per week.)<br>4 Hard exercise, competitive sports? Regularly and several times a week | 80 | 63,36 | 8th & 9th grade (plain English) | 20 | 26 |

\* = Only the main text of the questionnaires was used to calculate the level of readability. The text written in italics was excluded from the analysis.

PA = Physical Activity
